# 1 **Lamin A redistribution mediated by nuclear deformation determines dynamic** 2 **localization of YAP**

3 **Newsha Koushki<sup>1</sup>, Ajinkya Ghagre<sup>1</sup>, Luv Kishore Srivastava<sup>1</sup>, Chris Sitaras<sup>1</sup>, Haruka Yoshie<sup>1</sup>, Clayton**  
4 **Molter<sup>1</sup>, and Allen J. Ehrlicher<sup>1,2\*</sup>**

5 <sup>1</sup>Department of Bioengineering, McGill University, Montreal H3A 0E9

6 <sup>2</sup>Department of Anatomy and Cell Biology, McGill University, Montreal H3A 0C7

7 \*Lead Contact: [allen.ehrlicher@mcgill.ca](mailto:allen.ehrlicher@mcgill.ca) (AJE)

8

## 9 **Summary**

10 YAP is a key mechanotransduction protein with essential roles in diverse physiological processes.  
11 Dysregulation in YAP activity is associated with multiple diseases such as atherosclerosis, fibrosis,  
12 and cancer progression. Here we examine the physical stimuli that regulate dynamic YAP  
13 translocation to the nucleus. Through a combination of biophysical studies, we demonstrate that  
14 YAP localization is insensitive to cell substrate stiffness, but strongly determined by cellular  
15 contractile work, which in turn deforms the nucleus. We show that nuclear deformation from  
16 LINC-mediated cytoskeletal contractility or extracellular osmotic forces triggers YAP nuclear  
17 localization. By modulating the expression of lamin A and nuclear stiffness, we illustrate that  
18 nuclear rigidity modulates deformation-mediated YAP nuclear localization. Finally, we show that  
19 nuclear deformation causes relocalization of lamin A from the nuclear membrane to the  
20 nucleoplasm, and this is essential in allowing YAP to enter the nucleus. These results reveal key  
21 physical nuclear deformation mechanics that drive YAP nuclear import.

22 **Keywords:** YAP, nucleus, contractile work, TFM, substrate stiffness, cytoskeleton, LINC,  
23 deformation, mechanotransduction, mechanosensation

24

## 25 **Introduction**

26 Sensing and correctly responding to mechanical signals are essential aspects of biology. There are  
27 diverse mechanisms enabling cells to sense various mechanical stimuli, including ECM rigidity  
28 (Aragona et al., 2013; Cui et al., 2015; Discher et al., 2005; Elosegui-Artola et al., 2016; Engler et  
29 al., 2006; Ghibaudo et al., 2008; Kohn et al., 2015), dynamic stretching (Cui et al., 2015),  
30 cytoskeletal strain (Benham-Pyle et al., 2015; Ehrlicher et al., 2011) and compression (Guo et al.,  
31 2017). Many mechanosensory mechanisms regulate transcription factors, which in turn dictate  
32 fundamental aspects of cellular function, homeostasis, and tumorigenesis (Cho et al., 2017b;  
33 Driscoll et al., 2015; Dupont et al., 2011; Humphrey et al., 2014). Yes Associated Protein (YAP)  
34 is a crucial transcription factor that mediates the interplay between cellular mechanics and  
35 signaling cascades underlying gene expression, cell proliferation, differentiation fate decisions,  
36 and organ development (Dupont et al., 2011; Kofler et al., 2018; Pavel et al., 2018; Piccolo et al.,  
37 2014; Varelas, 2014; Zhao et al., 2010; Zhao et al., 2007). Thus, the spatio-temporal localization  
38 of YAP provides critical information about the regulatory state of the cell. Increased YAP activity  
39 can cause abnormal and uncontrollable cell proliferation and invasiveness, leading to multiple

40 diseases, including fibrosis and diverse cancers as a result of activating genes associated with  
41 oncogenic transcription factors (Donato et al., 2018; Lee et al., 2019; Varelas, 2014; Zanconato et  
42 al., 2016b; Zhao et al., 2010).

43  
44 Microenvironment mechanics appears to influence YAP localization, with several studies  
45 reporting that YAP nuclear localization and activity tends to increase with increasing substrate  
46 stiffness (Das et al., 2016; Dupont et al., 2011; Elosegui-Artola et al., 2016; Fischer et al., 2016;  
47 Nardone et al., 2017). This has led to the hypothesis that substrate stiffness directly influences  
48 YAP localization and its resulting effects such as proliferation and differentiation (Dupont et al.,  
49 2011; Huebsch et al., 2010; Oliver-De La Cruz et al., 2019; Rammensee et al., 2017). However,  
50 the abrogation of these effects by cytoskeletal disruption demonstrates that YAP activity is more  
51 directly related to cytoskeletal processes and contractility rather than to substrate mechanics (Das  
52 et al., 2016; Dupont et al., 2011; Fischer et al., 2016; Shiu et al., 2018). Elosegui-Artola et al  
53 demonstrated that disrupting the actin-LINC complex (Linker of Nucleoskeleton and  
54 Cytoskeleton) attenuates YAP activity's correlation with substrate stiffness, further suggesting a  
55 role of cytoskeletal contractility in YAP activity (Elosegui-Artola et al., 2017). However, how  
56 contractile forces vary during cell movement, and how they actually determine dynamic movement  
57 of YAP in real-time remains unclear, but they are hypothesized to be related to nuclear  
58 mechanosensing. Recent work which demonstrates that direct application of force to the nucleus  
59 is sufficient to regulate YAP activity reinforces the idea that nuclear deformation is a key  
60 mechanism of YAP regulation (Elosegui-Artola et al., 2017). These findings suggest that nuclear  
61 deformability and nuclear deformation have essential roles in cells correctly responding to cues  
62 from their mechanical environment.

63  
64 Among the proteins underlying the inner nuclear membrane, lamin A is known as one of the crucial  
65 intermediate filament proteins that confers physical support of the nucleus and modulates nuclear  
66 stiffness (Athirasala et al., 2017; De Vos et al., 2011; Lammerding, 2011; Lammerding et al., 2006;  
67 Lammerding et al., 2004; Olins et al., 2008; Pajeroski et al., 2007). Mutations in lamin A are  
68 associated with impaired nuclear mechanotransduction resulting in a variety of human diseases  
69 (Bonne et al., 1999b; De Sandre-Giovannoli et al., 2003; Eriksson et al., 2003; Fatkin et al., 1999;  
70 Lammerding et al., 2004). Lamin A expression level also modulates nuclear rigidity; suppression  
71 of lamin A softens the nuclei and increases nuclear deformability (Guilluy et al., 2014; Hanson et  
72 al., 2015; Lammerding et al., 2004), whereas lamin A overexpression increases nucleus' stiffness  
73 (Hanson et al., 2015; Harada et al., 2014). Lamin A expression levels can be affected by cell  
74 division (Moir et al., 2000) and stem cell differentiation (Schirmer and Gerace, 2004). Previous  
75 studies have also illustrated an interplay between lamin A expression and substrate stiffness  
76 (Buxboim et al., 2017; Buxboim et al., 2010; Swift and Discher, 2014; Swift et al., 2013). Soft  
77 substrates where the cells have limited spread area, promote lamin A turnover, phosphorylation  
78 and subsequent lamin A degradation. Whereas stiff substrates stabilize lamin A as a result of larger  
79 forces being transduced to the nucleus, leading to nuclear tension and conformational change in

80 lamins which prohibits access of kinases (Athirasala et al., 2017; Bertacchini et al., 2013; Cho et  
81 al., 2017a; Goldman et al., 2002; Miroshnikova et al., 2017; Swift et al., 2013). The similar impacts  
82 of mechanical cues on lamin A expression levels and YAP activation, and the correlation of these  
83 proteins with stem cell differentiation and cell division suggest a relationship between lamin A,  
84 nuclear mechanics, and YAP mechanosensing, however, no such link has been established.

85

## 86 **Results**

### 87 **YAP nuclear localization is dynamic and independent of cell spread area and** 88 **substrate stiffness.**

89 To examine the dynamics of YAP localization, we transfected living NIH 3T3 cells with EGFP-  
90 YAP (pEGFP-C3-hYAP1, Addgene, plasmid #17843) and with EBFP2-Nucleus-7 (nuclear  
91 localization signal, Addgene, plasmid #55249) to visualize the nucleus. Similar to previous studies,  
92 our principal metric for YAP activity is the ratio of fluorescence of EGFP-YAP in the nucleus to  
93 EGFP-YAP in the cytoplasm and is henceforth referred to as the YAP Ratio (YR) (Figures 1A-  
94 1C, Figure S1A). To examine how cellular interactions with the substrate determine endogenous  
95 YAP and EGFP-YAP localization, we quantified the YR as cells spread on polydimethylsiloxane  
96 (PDMS) substrates with different Young's moduli (0.3 and 48 kPa) (Au - Yoshie et al., 2019;  
97 Yoshie et al., 2018). Both transfected and immunostained cells displayed a broad range of YRs on  
98 soft PDMS, stiff PDMS, and glass substrates without a stiffness trend (Figures 1A-1C, Figure  
99 S1A). We observed both nuclear ( $YR > 1.5$ ) and cytoplasmic ( $YR < 1$ ) localization of endogenous  
100 YAP and EGFP-YAP independent of substrate rigidity.

101

102 We also monitored the EGFP-YAP distribution during cell movement on PDMS substrates finding  
103 that EGFP-YAP localization is highly dynamic in time, with no stiffness correlation over time  
104 across diverse PDMS substrate moduli (0.3, 2, 5, 12, 18, 100 kPa) and fibronectin-coated glass  
105 (Figures 1D-1F, Figures S1B and S1C). The time-averaged YR on stiff substrates appeared  
106 identical to compliant substrates, suggesting that neither the magnitude of YAP localization nor  
107 the shuttling frequency is set by substrate stiffness (Figures 1D-1F).

108

109 Previous cell substrate studies on polyacrylamide (PAA) have reported a positive correlation  
110 between the YR and substrate stiffnesses; YAP cytoplasmic localization was only observed in  
111 round cells with small spread area on soft PAA substrates with moduli less than 1 kPa (Das et al.,  
112 2016; Dupont et al., 2011; Elosegui-Artola et al., 2017), whereas 5 kPa was identified as a critical  
113 modulus for high YR (Aragona et al., 2013; Dupont et al., 2011; Elosegui-Artola et al., 2017).  
114 Using PDMS substrates, we observed that the YR did not correlate with substrate stiffness (Figures  
115 1F and 1G). One possible explanation may be ascribed to non-mechanical variations in PAA  
116 substrates absent on PDMS (Trappmann et al., 2012).

117

118 To examine the impact of PDMS or PAA on YAP localization, we prepared PAA gels with  
119 uniform polymer mass and tuned the substrates stiffness by varying the crosslinker concentration.

120 Similar to previous studies, cells on very compliant PAA gel with a Young's modulus of 1 kPa  
121 were round with low spread area and low YAP activity ( $YR < 1$ ) (Figure 1G, Figures S1D, S1E and  
122 S1I). However, cells on very compliant PDMS with a Young's modulus of 300 Pa displayed a  
123 wide range of spread areas and random distributions of YAP between their nuclei and cytoplasm,  
124 similar to those on the stiff PDMS (Figures 1E-1G, Figures S1F-S1H). Cells on stiff PAA  
125 substrates with moduli of 5, 20, and 50 kPa displayed highly dynamic EGFP-YAP localization  
126 with diverse spread areas similar to those we observed on PDMS substrates (Figures 1D and 1G,  
127 Figures S1D, S1E, S1J and S1K). These results suggest that YAP nuclear localization may be  
128 reduced on very soft ( $E \leq 1$  kPa) PAA substrates due to a lack of cell spreading.

129  
130 To examine the roles of substrate adhesion and cell spread area on YAP translocation, we also  
131 tracked YAP localization in round suspended cells (Figure 1H). Here, during initial cell  
132 attachment, we consistently measured low YRs in round cells with small spread area (Figures 1H  
133 and 1I). As soon as those suspended cells attached and spread on the 5 kPa PDMS substrate, YAP  
134 distributed randomly between the nucleus and cytoplasm with no clear correlation with cell  
135 spreading (Figures 1H and 1I). Our results suggest that only in the case of rounded exceptionally  
136 small cell areas ( $< \sim 1000 \mu\text{m}^2$ ) is YAP consistently in the cytoplasm.

137  
138 The apparent random spatio-temporal localization of YAP on both PAA and PDMS substrates,  
139 coupled with an absence of correlation between YAP localization and substrate stiffness or cell  
140 spreading implies that another mechanism may impact YAP localization. Actin stress fibers and  
141 intracellular forces may more directly regulate YAP localization (Bouzid et al., 2019; Cho et al.,  
142 2017a; Elosegui-Artola et al., 2017; Guilluy and Burridge, 2015; Martino et al., 2018; Shiu et al.,  
143 2018). We thus suspected that dynamic changes in contractile stress may lead to dynamic and  
144 correlated changes in YAP localization.

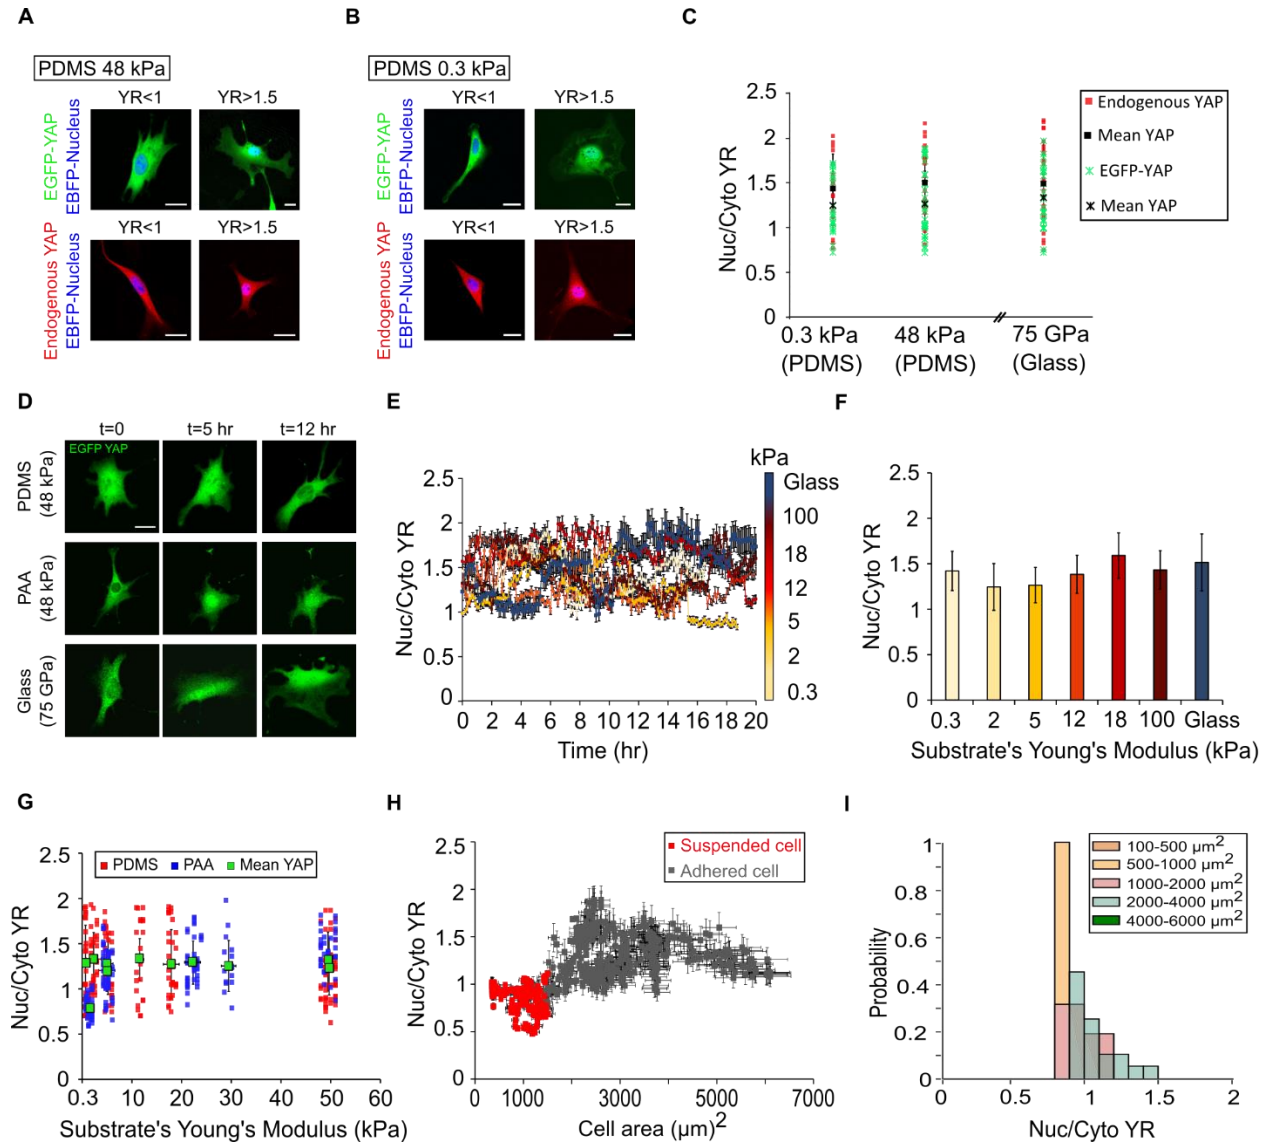

145  
146

147 **Figure 1. YAP localization is dynamic overtime and independent of substrate stiffness or cell**  
148 **spread area.**

149 A) Example image of EGFP-YAP and endogenous YAP merged with EBFP-NLS nucleus on stiff  
150 PDMS and, B) soft PDMS, C) YR variation on soft, stiff PDMS, and glass for EGFP and  
151 endogenous YAP. Black squares and black stars are mean YR values for EGFP-YAP and  
152 endogenous YAP, respectively on each substrate ( $n > 15$  cells per each condition), D) Example of  
153 EGFP-YAP variation during cell movement on PDMS, PAA, and glass over time, E)  
154 Quantification of YR during cells movement on PDMS substrates with different stiffnesses and on  
155 the fibronectin-coated glass, F) Time average of YR in the same condition as in (E), G) YR  
156 variation for NIH 3T3 cells seeded on different PDMS (shades of red) and PAA (shades of blue)  
157 substrates with different stiffnesses ( $n > 20$  cells per each condition), H) Quantification of YR and  
158 cell spreading area before (red) and during cells attachment (gray) on 5 kPa PDMS substrate ( $n > 10$   
159 cells), I) YAP distribution based on cell spread area for an example cell before and during adhesion

160 to PDMS with the same modulus. Scales bars are 20  $\mu\text{m}$ . Error bars indicate standard deviation  
161 (SD).

162

### 163 **YAP nuclear localization increases with cell contractility.**

164 We employed Traction Force Microscopy (TFM) (Butler et al., 2002) to track single-cell  
165 contractility in time on PDMS substrates with specified moduli, and compared these metrics with  
166 the dynamic YR; we found that as the contractile state of the cell changed in time, it was temporally  
167 correlated with the YR (Figures 2A-2E, Figures S2A-S2H). We then compared the instantaneous  
168 contractile states of single cells with their YRs over a broad range of substrate stiffnesses, finding  
169 that both traction stress and substrate bead displacement correlated with YRs of the corresponding  
170 cell (Figures 2F and 2G). These data separated into different correlated populations as a function  
171 of substrate stiffness. When we examined YR as a function of cell contractile work for different  
172 PDMS substrates, we found all data collapsed onto a single curve (Figure 2H), illustrating that cell  
173 contractile work appears to relate to YAP localization.

174

175 We then disrupted myosin activity and the actin cytoskeleton using 50  $\mu\text{M}$  RhoA-associated  
176 protein kinase (ROCK) inhibitor (Y27632) and 1.5  $\mu\text{M}$  cytochalasin D (CytoD) (Amano et al.,  
177 2010; Mehta and Gunst, 1999) respectively, and monitored their effects on YAP localization  
178 (Figures S2I and S2J). Both pharmacological treatments inhibited cell contractility and suppressed  
179 YAP nuclear localization  $\sim 15$  and  $\sim 40$  minutes after CytoD and ROCK inhibitor treatments,  
180 respectively (Figures 2I and 2J, Figures S2I and S2J). Critically, these cytoskeletal poisons did not  
181 change the relationship between cell contractility and YR, and data from cytoskeleton-disrupted  
182 cells followed the same YAP-Strain Energy curve (Figure 2K), suggesting that contractile work  
183 predicts YAP localization across all probed cytoskeletal states.

184

185 As contractile work appears to determine YAP localization, we considered the cellular components  
186 which are mechanically impacted by cell contractile work, and may drive changes in the YR. Since  
187 the nucleus is at the heart of YAP activity and has been previously implicated in force-mediated  
188 YAP activity (Driscoll et al., 2015; Elosegui-Artola et al., 2017; Kirby and Lammerding, 2018;  
189 Shiu et al., 2018), we examined in detail how contractile work mechanically deforms the nucleus  
190 and relates to YAP nuclear localization.

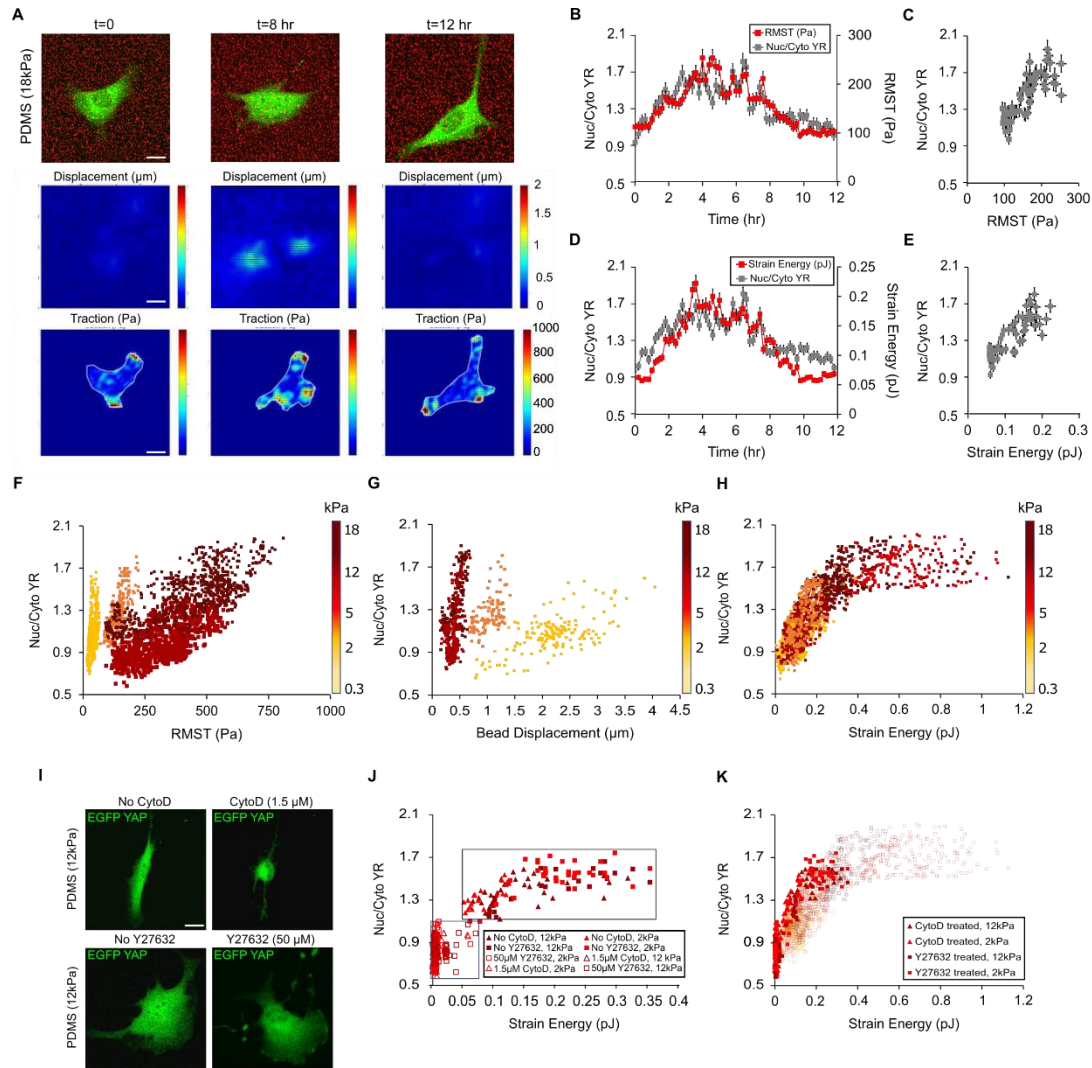

191  
 192

193 **Figure 2. YAP localization is correlated with cell contractility.**

194 A) Representative traction stress and bead displacement maps of EGFP-YAP transfected NIH 3T3  
 195 cell during its movement on 18 kPa PDMS substrate, B) YR vs RMST over time for the same cell  
 196 as in (A) with time interval of 12 minutes, C) Scatter plot of YR as a function of RMST, D)  
 197 Quantification of YR vs Strain Energy for the same cell over time, E) Scatter plot of YR vs Strain  
 198 Energy for the same cell, F) YR vs RMST for multiple cells seeded on PDMS substrates with  
 199 different stiffnesses ( $n > 20$  cells per condition), G) YR vs bead displacement for the same cells as  
 200 in (F), H) Scatter plot of YR as a function of Strain Energy for the same cells, I) Example of EGFP-  
 201 YAP transfected cells before and after pharmacological treatments, J) Quantification of YR vs  
 202 Strain Energy for multiple cells on PDMS substrates with different Young's moduli before (solid  
 203 markers) and 30 minutes after (open markers) pharmacological treatments ( $n > 10$  cells per  
 204 condition), K) All data of YR as a function of Strain Energy for nontreated (partially transparent  
 205 data) and pharmacologically treated cells. Scale bars are 20  $\mu\text{m}$ . Error bars indicate standard  
 206 deviation (SD).

207

## 208 **Cell contractility regulates YAP localization via nuclear deformation**

209 To examine the interplay between contractility and nuclear deformation, we quantified the nuclear  
210 volume using confocal Z-stacks for cells with different contractility. We found a relationship  
211 between contractile work and nuclear volume (Figures 3A and 3B). One key connection between  
212 the cytoskeleton and nucleus is the LINC complex (Bouzid et al., 2019; Driscoll et al., 2015;  
213 Elosegui-Artola et al., 2017; Lammerding, 2011; Lombardi et al., 2011). To examine the role of  
214 the LINC complex in transducing contractile work into nuclear compression, we disrupted the  
215 LINC complex by transfecting the cells with two dominant-negative EGFP-Nesprin1-KASH and  
216 EGFP-Nesprin2-KASH plasmids (DNK1/2) at the same time iRFP-YAP was transfected (Figure  
217 3A). Lombardi et al showed that overexpression of DNK1/2 inhibits interaction between nesprins  
218 and SUN proteins, key components of the LINC complex, at the nuclear envelope by nonspecific  
219 binding to endogenous SUN proteins (Lombardi et al., 2011). Our results demonstrated that  
220 suppressing the LINC complex in DNK1/2 transfected cells decreased the effect of cell  
221 contractility induced nuclear compression (Figure 3B).

222

223 We then examined how the presence of LINC-mediated contractility influences YAP localization.  
224 Here we found that YRs were generally decreased in LINC disrupted cells relative to wild-type  
225 (WT) cells for any given cell contractility (Figure 3C, Figures S3A and S3B). This paralleled our  
226 observation of the effect of LINC complex disruption on nuclear compression, suggesting a  
227 connection between nuclear volume and YR. When we examined YRs as a function of nuclear  
228 volume, we found a complete overlap between WT and DNK1/2 transfected cell data, suggesting  
229 that nuclear volume may directly regulate YAP activity (Figure 3D). These findings suggest that  
230 acto-myosin contractility and LINC-mediated cytoskeletal-nuclear coupling thus contribute to  
231 nuclear compression, which appears to describe contractility-based YAP localization.

232

233 Returning to the possible influence of substrate stiffness on mechanotransduction mechanisms, we  
234 measured YRs as a function of nuclear volume on diverse PDMS substrates with different  
235 stiffnesses. Again, we found that cell contractility-driven nuclear compression is correlated with  
236 YAP nuclear localization in a substrate stiffness independent way, with similar trends being  
237 observed between WT and LINC disrupted cells (Figure 3E). We also observed no trend between  
238 nuclear volumes and substrate stiffness (Figure S3C).

239

240 Our results highlight the role of nuclear volume and deformation in mechanosensing, which is  
241 consistent with the idea that nuclear deformation is necessary to open nuclear pores, allowing YAP  
242 nuclear translocation (Elosegui-Artola et al., 2017). We also demonstrated that inhibition of  
243 contractile force transfer to the nucleus decreases YAP nuclear import, suggesting that the amount  
244 of stress applied to the nucleus moderates its deformation, and consequently YAP activity. We  
245 then postulated that varying nuclear stiffness would also modulate contractile-dependent nuclear



246 deformation and YAP localization. This means that the nucleus' stiffness is likely key in  
247 determining specific deformation-mediated mechanosensation to applied stresses.

248

249 **Stiffer nuclei require more contractile work to trigger YAP nuclear**  
250 **localization.**

251 The interplay between lamin A expression level and nuclear stiffness led us to question whether  
252 changes in lamin A-mediated nuclear stiffness would result in changes in contractile work  
253 mediated nuclear compression, and corresponding changes in YAP localization. We manipulated  
254 lamin A expression levels and measured corresponding nuclei deformation and nuclei stiffness  
255 under different osmotic compressions applied by different concentrations of 400 Da polyethylene  
256 glycol (PEG) (see Methods) (Guo et al., 2017) (Figures 3F and 3G, Figure S3D). To quantify total  
257 single-cell lamin A expression levels, we transfected the cells with GFP-lamin A chromobody  
258 (Zolghadr et al., 2012). We found that nuclear stiffness increases as a function of lamin A  
259 expression (Figure 3G, Figure S3D).

260

261 We then examined how contractile work deforms nuclei with different stiffnesses, and how this in  
262 turn regulates YAP localization. We found that in lamin A silenced cells with compliant nuclei  
263 (Figure 3G), nuclei were observed to be smaller due to contractility induced nuclear compression  
264 (Figure 3I) with increased YRs (Figures 3H and 3J). However, in lamin A overexpressed cells,  
265 more contractile work was required to compress the nucleus and localize YAP to the nucleus  
266 (Figures 3H-3J, Figure S3E). Since lamin A expression determines the nuclear stiffness, this  
267 suggests that contractile work is not a direct regulator of YAP activity, and that nuclear volume  
268 may be a more robust independent variable. However, we note that the lamin A overexpressed  
269 nuclei deviate from the overall trend of YAP dependence on nuclear volume (Figure 3K).

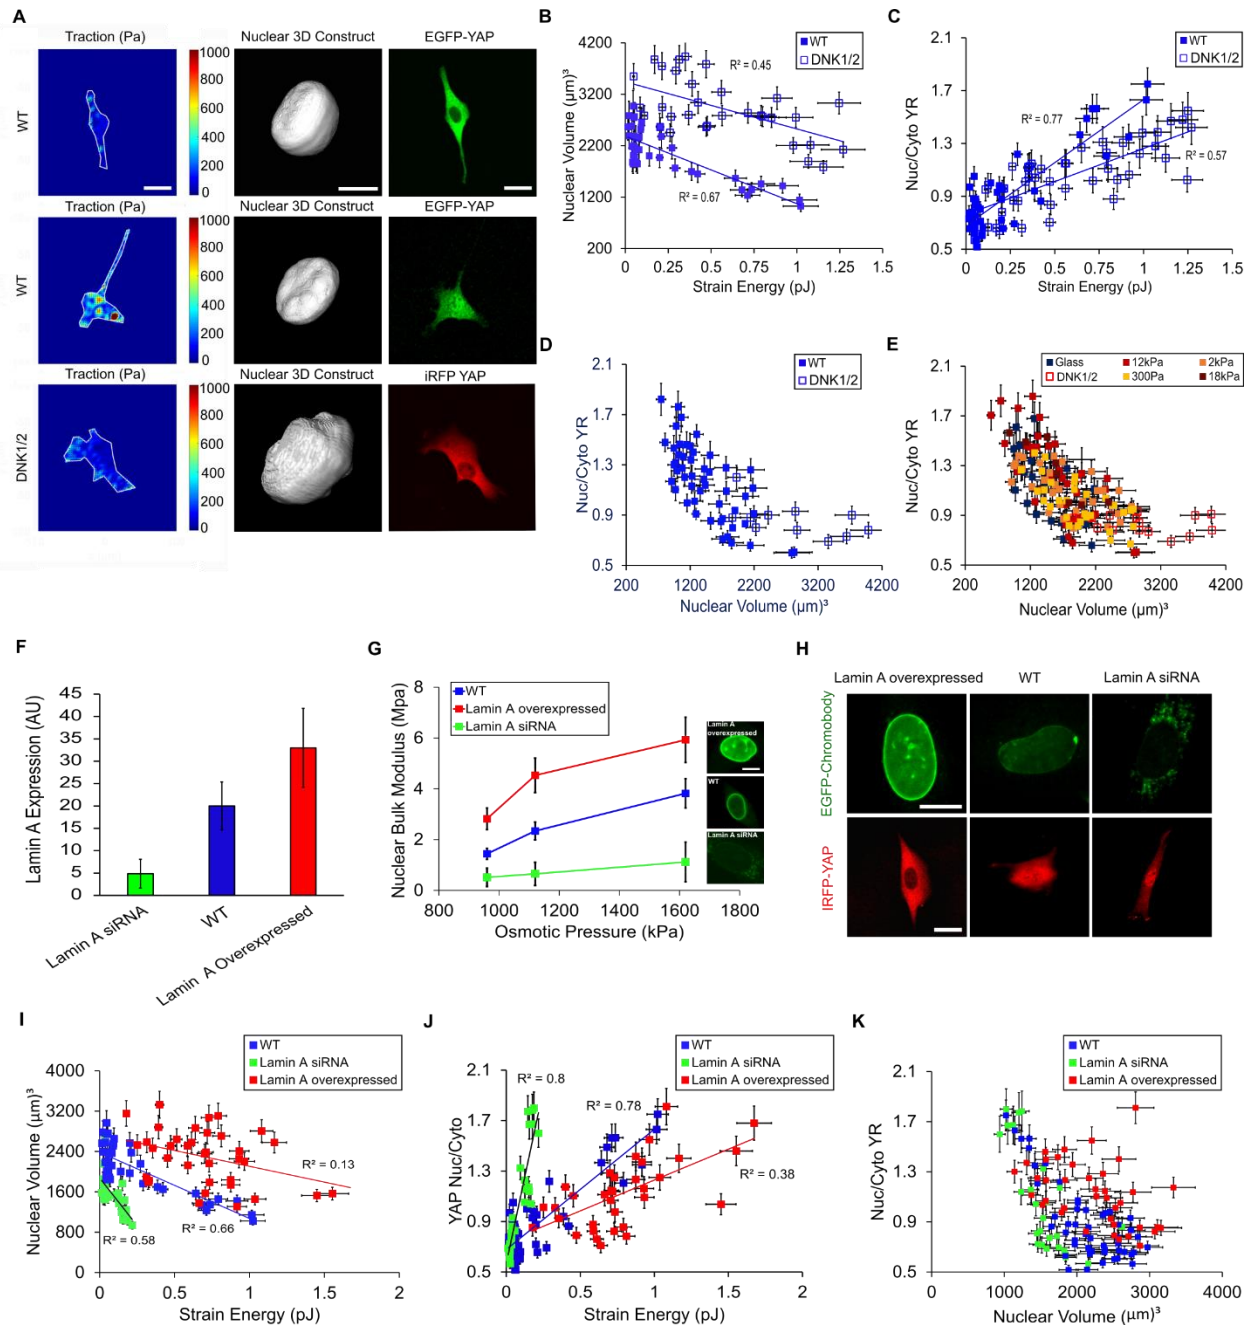

270  
271

272 **Figure 3. Strain Energy mediated nuclear deformation and YAP activity is directed by LINC**  
273 **complex and nuclear mechanics.**

274 A) Representative nuclear volumes and EGFP-YAP distributions in WT and DNK1/2  
275 overexpressed cells with diverse contractility states on 12 kPa PDMS substrate, B) Quantification  
276 of nuclear volume vs Strain Energy for WT and DNK1/2 cells seeded on 12 kPa PDMS (n>10  
277 cells per each condition), C) Quantification of YR vs Strain Energy for the same cells as in (B),  
278 D) YR as a function of nuclear volume for the same cells, E) Correlation between YR and nuclear  
279 volume for WT and DNK1/2 overexpressed cells seeded on PDMS substrates (n>10 cells per each

280 condition), F) Quantification of lamin A expression level for lamin A siRNA, lamin A  
281 overexpressed and WT cells (n>20 cells per each condition), G) Quantification of nuclear bulk  
282 moduli under different osmotic pressures applied to lamin A siRNA, lamin A overexpressed and  
283 WT cells (n>20 cells per each condition), H) Examples of GFP-chromobody and iRFP-YAP in  
284 different cells with different lamin A expression level, I) Quantification of nuclear volume vs  
285 Strain Energy for cells with different lamin A expression levels (n>15 cells per each condition), J)  
286 YR vs Strain Energy for the same cells as in (I), K) YR vs nuclear volume for the same cells.  
287 Scale bars are 20  $\mu\text{m}$  for cells and 10  $\mu\text{m}$  for nuclei. Error bars indicate standard deviation (SD).  
288

### 289 **YAP translocation correlates with nuclear deformation independent of** 290 **contractile work, actin filaments and LINC complex.**

291 Having observed a correlation between YAP localization and contractility-modulated nuclear  
292 volume under the diverse conditions of cytoskeletal poisons, LINC suppression, and varied lamin  
293 A expression, we then postulated that modifying nuclear volume through *any* mechanism may be  
294 necessary and sufficient for YAP nuclear localization. To test this hypothesis, we applied external  
295 osmotic forces on the cells using different concentrations of PEG400, which has previously been  
296 shown to reversibly compress cells and nuclei (Guo et al., 2017; Khavari and Ehrlicher, 2019). We  
297 then measured the nuclear volumes and YRs for WT cells before and after applying different  
298 osmotic pressures, finding the same conserved relationship between nuclear volume and YAP  
299 localization (Figures 4A and 4B). Nuclear volume and YRs did not change under 960 kPa pressure,  
300 whereas increase in YR and decrease in nuclear volume were observed under 1.62 MPa (Figures  
301 4A and 4B, Figures S4A and S4B). We then considered the role of substrate adhesion in YAP  
302 localization by applying osmotic compression to cells in suspension under 10% PEG, which in  
303 adhered cells consistently increased YRs.; in compressed suspended cells we did not measure  
304 increases in YRs, suggesting that substrate adhesion is an essential aspect of YAP localization in  
305 nuclear compression (Figures S4C and S4D).  
306

307 Next, we examined the role of the actin cytoskeleton in adhered cells in osmotic pressure mediated  
308 YAP activity by depolymerizing F-actin with CytoD. Here we again found the same nuclear  
309 volume and YR trend, demonstrating that actin cytoskeleton is not essential for externally  
310 compressive YAP mechanosensing (Figures 4C and 4D). Nuclear volumes increased and YRs  
311 decreased after depolymerizing actin filaments; however, 1.12 MPa osmotic pressure was  
312 sufficient to translocate YAP into the nucleus in the absence of actin (Figure 4D). We also revisited  
313 the role of the LINC complex in YAP nuclear localization under external pressure by blocking  
314 LINC complex via overexpression of DNK1/2. Compared to WT cells, a lower osmotic pressure  
315 (1.12 MPa) was required to significantly deform the nucleus and activate YAP in LINC disrupted  
316 cells, demonstrating that external compressive forces deform the nucleus and activate YAP  
317 independent of the LINC complex, but that the LINC complex may serve a mechanoprotective  
318 role in compression (Figures 4E and 4F). Critically, all YAP activity and nuclear volume data for  
319 WT, CytoD treated and DNK1/2 transfected cells appear as a single correlated distribution

320 independent of experimental conditions, demonstrating an apparent connection between nuclear  
321 volume and YAP activity (Figure 4G).

322  
323 While YAP activity appears related to nuclear volume, we questioned how relative nuclear  
324 deformation influences changes in YAP activity. To examine this, we measured the change in YAP  
325 ratios ( $\Delta YR/YR_0$ ) as a function of the change of nuclear volume ( $-\Delta V/V_0$ ) under different external  
326 pressures applied to WT, DNK1/2, and CytoD treated cells. For all conditions, the change in YR  
327 as a function of change in nuclear volume fell on a single curve, suggesting that nuclear  
328 deformation is related to YAP localization in a magnitude-dependent and conserved manner  
329 (Figure 4H). We also observed that the nuclei of DNK1/2 and CytoD treated cells deformed  
330 relatively more under same amount of pressure as compared with WT cells, further suggesting a  
331 potential mechanoprotective role for LINC and the actin cytoskeleton in the context of external  
332 compression (Figure 4H, Figure S4E). These results suggest that while acto-myosin contractile  
333 work is an essential regulator of YAP under typical cellular conditions, that nuclear deformation  
334 underlies YAP localization. This would suggest that nuclear deformability impacts required stress  
335 to trigger YAP nuclear transport.

336  
337 **Lamin A mediated nuclear stiffness regulates the amount of stress required to**  
338 **trigger YAP nuclear transport.**

339 We next examined the role of nuclear stiffness modulated by lamin A expression level, finding  
340 that cells with increased lamin A expression required more applied stress to reach an equivalent  
341 YR. SiRNA lamin A cells required lower pressure (960 kPa) than WT or lamin A overexpressed  
342 cells to compress nuclei and localize YAP in the nucleus (Figures 4I and 4J), while 1.12 MPa was  
343 required to trigger YAP nuclear localization in WT and lamin A overexpressed cells (Figures 4K  
344 and 4L, Figures S4F and S4G) and increased further under 1.62 MPa osmotic pressure (Figures  
345 4K and 4L, Figures S4H and S4I). These findings suggest that lamin A-mediated nuclear stiffness  
346 affects the amount of stress required to activate YAP.

347  
348 These findings describe a preserved relationship between YAP and nuclear volume, observed  
349 under different pressures when modifying the stiffness of the nucleus via lamin A expression  
350 (Figure 4K). However, we noted that lamin A overexpression itself also appeared to impact YAP  
351 localization, with lamin A overexpressed cells yielding higher YAP ratios than those observed in  
352 similar volume in WT cells (Figures 4I and 4K, Figures S4F and S4H): lamin A overexpression  
353 also led to larger than expected changes in YAP ratios as a function of nuclear deformation (Figure  
354 4L, Figures S4G and S4I). These data suggest that lamin A may play a role beyond that of  
355 modulating nuclear stiffness and may be directly related to YAP mechanosensing.

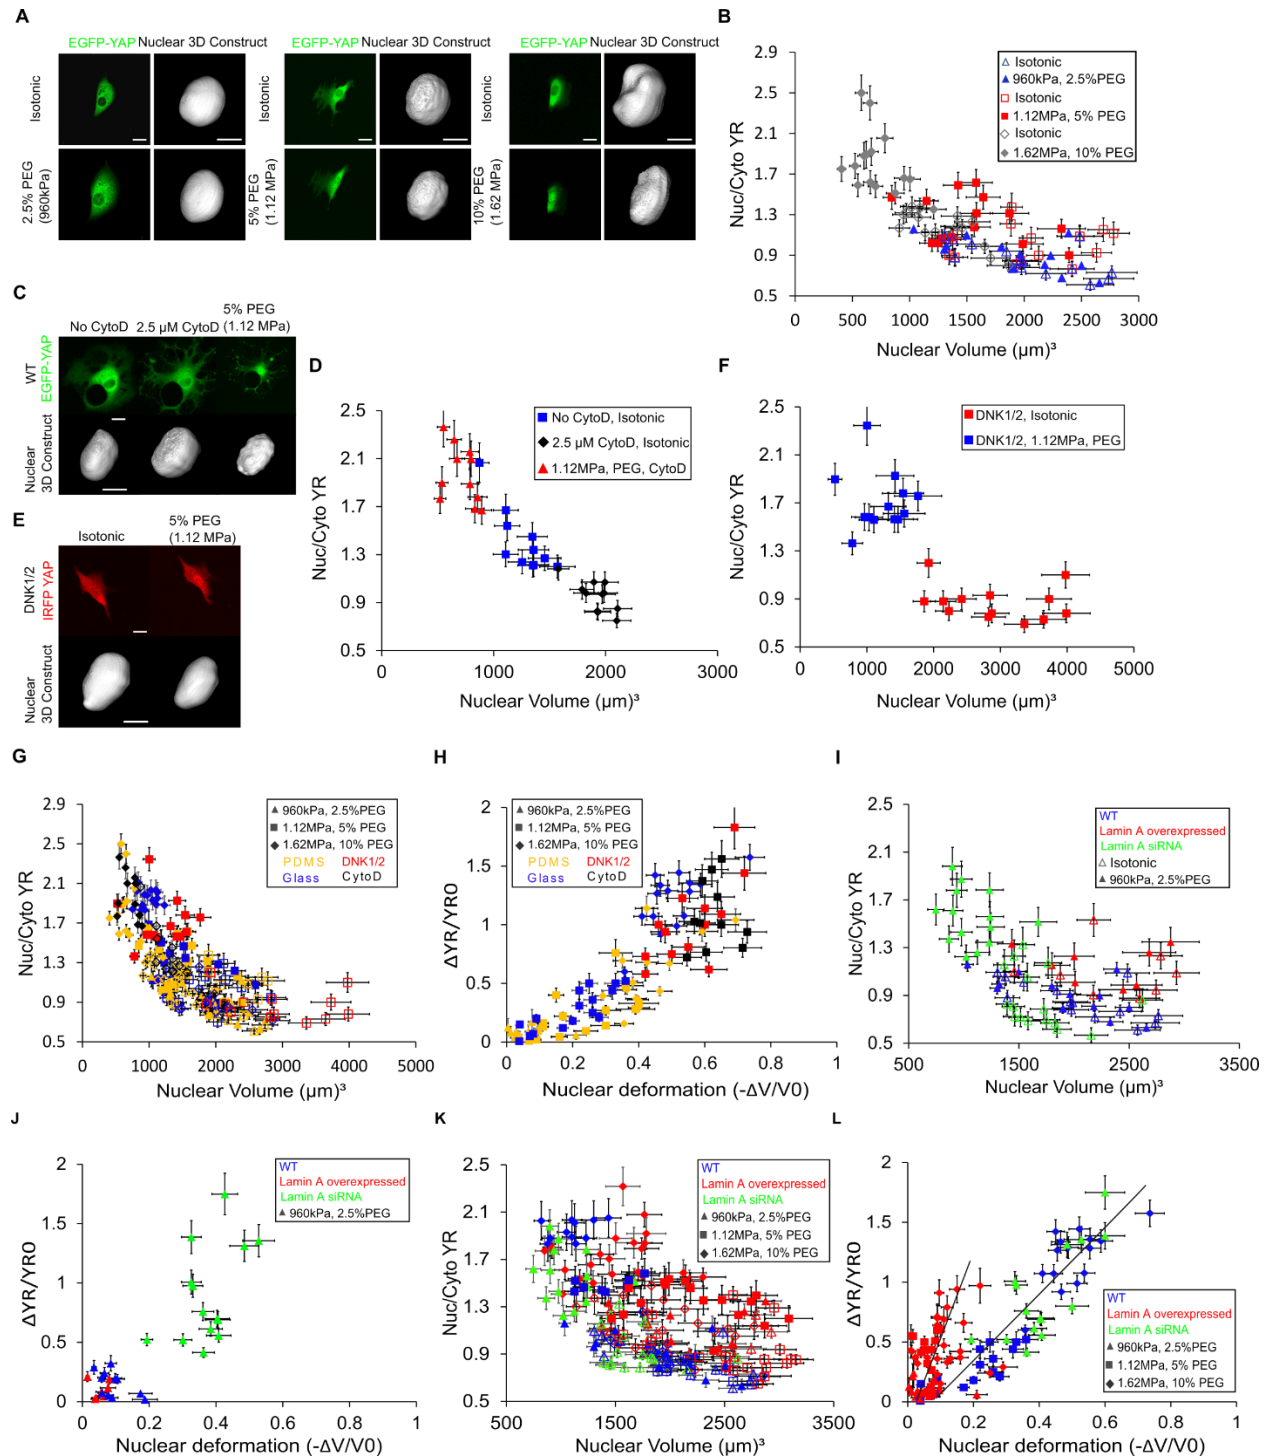

356  
357

358 **Figure 4. YAP translocation correlates with nuclear deformation independent of contractile**  
359 **work, actin filaments and LINC complex.**

360 A) Example of YAP localization and nuclear volume in EGFP-YAP transfected cells under  
361 different osmotic pressures, B) Quantification of YR vs nuclear volume in isotonic (open markers)  
362 and relevant hyperosmotic conditions (solid markers) ( $n > 10$  cells per each condition), C) Example

363 of changes in nuclear volume and EGFP-YAP localization in CytoD treated cells after applying  
364 5% PEG400 (1.12 MPa osmotic pressure), D) YR vs nuclear volume in isotonic condition (blue  
365 squares), 30 minutes after adding 2.5  $\mu$ M CytoD (black diamonds) and 20 minutes after adding  
366 5% PEG400 (red triangle) (n>10 cells), E) Example of changes in iRFP-YAP localization and  
367 nuclear volume in GFPDNK1/2 transfected cells before and after adding 5% PEG400, F)  
368 Quantification of YR vs nuclear volume for GFP-DNK1/2 transfected cells before (red squares)  
369 and after (blue squares) adding 5% PEG400 (n>10 cells), G) All data of YR vs nuclear volumes  
370 for CytoD treated (black markers), DNK1/2 (red markers) transfected cells seeded on the glass and  
371 WT cells seeded on the glass (blue markers) and 300 Pa PDMS (yellow markers) under different  
372 hyperosmotic conditions. All open markers are representative of the cells in isotonic condition and  
373 solid markers are the same cells after osmotic compression (n>10 cells per each condition), H)  
374 Quantification of YR change ( $\frac{\text{YR after adding PEG}-\text{initial YR}}{\text{initial YR}}$ ) as a function of nuclear volumetric  
375 deformation  
376 ( $-\frac{\text{Nuclear volume after adding PEG}-\text{Initial nuclear volume}}{\text{Initial nuclear volume}}$ ) for the same values measured in (G), I) YR vs  
377 nuclear volume for WT, lamin A siRNA, and lamin A overexpressed cells before (open markers)  
378 and after applying 960 kPa osmotic pressure (solid markers) (n>10 cells per each condition), J)  
379 YR change vs nuclear deformation for the same condition as in (I), K) Quantification of YR vs  
380 nuclear volume for WT, lamin A siRNA, and lamin A overexpressed cells before (open markers)  
381 and after adding applying different osmotic pressures (solid markers) (n>10 cells per each  
382 condition), L) Quantification of YR change vs nuclear deformation for the same condition as in  
383 (K). Scale bars are 20  $\mu$ m for the cells and 10  $\mu$ m for the nuclei. Error bars indicate standard  
384 deviation (SD).

### 385 386 **Lamin A redistributes from the nuclear membrane to nucleoplasm under** 387 **nuclear deformation and directly regulates YAP localization**

388 When we looked more closely at the data, we found that cells with larger contractility had more  
389 compressed nuclei with more YAP in the nucleus as previously established, however, we also  
390 noted that the lamin A distribution was impacted; cells with lower contractility had more lamin A  
391 in the nuclear membrane (nucleus 1 in Figures 5A, 5C and 5D), whereas cells with larger  
392 contractility had a more uniform distribution of lamin A in their nuclei and relatively less in the  
393 nuclear membrane (nucleus 2 in Figures 5B-5D). This apparent connection between lamin A  
394 localization and contractility prompted further TFM experiments; here we measured the lamin A  
395 fluorescence in the nuclear membrane (Lm) as a function of cell contractile work, finding that  
396 strongly contractile cells have lower Lm values (Figure 5E), and smaller nuclear volumes (Figure  
397 S5A). Additionally, examining YAP localization, we found an inverse relationship between Lm  
398 and YR (Figure 5F). We postulated that if contractile forces change the nuclear volume, they may  
399 impact lamin A localization, which in turn might directly regulate YAP localization. To test this  
400 idea, we quantified Lm as a function of varied nuclear volume by applying different osmotic  
401 compressions to WT, lamin A siRNA, and lamin A overexpressed cells. Similar to YAP activation,

402 in lamin A siRNA cells lower force (960 kPa) was sufficient to redistribute lamin A from the  
403 nuclear membrane to the nucleoplasm (decrease in Lm) due to high nuclear deformability (Figure  
404 5G). In WT and lamin A overexpressed cells, lamin A stayed intact in the nuclear membrane under  
405 the same pressure (Figure 5G), but higher force (1.12 MPa) triggered reduction of lamin A at the  
406 nuclear membrane (Lm) of WT and lamin A overexpressed cells (Figure S5C). Minimal Lm values  
407 obtained under 1.62 MPa as a result of nuclear deformation (Figure S5G). These results were  
408 similar to force mediated YAP activation in different cells with different nucleus' stiffnesses  
409 (Figures 4I and 4K, Figures S4F and S4H).

410  
411 We found a conserved trend of decreased Lm as a function of decreasing nuclear volume (Figure  
412 5H). However, we noted that the lamin A overexpressed cells deviate from the trend and display  
413 lower Lm values for a given volume than WT and lamin A siRNA cells. To further analyze if  
414 lamin A does indeed redistribute in response to nuclear deformation, we compared the change in  
415 Lm ( $\Delta Lm$ ) with the amount of nuclear deformation under osmotic compression. We found a  
416 similarly conserved trend under 960 kPa pressure (Figure S5B), whereas under higher pressures  
417 we observed a deviation of the lamin A overexpressed cells from WT and lamin siRNA cells  
418 (Figure 5I, Figures S5D and S5H) that is reminiscent of our observations in nuclear deformation  
419 mediated YAP activation (Figures 3K, 4K, 4L, and 5H). These deviations and similarity between  
420 nuclear deformation induced lamin A redistribution and YAP activation cumulatively suggest that  
421 YAP is influenced by nuclear volume, but that the lamin A distribution may be a direct independent  
422 variable in regulating YAP.

423  
424 To examine how the lamin A distribution regulates YAP, we plotted YR as a function of Lm, and  
425 we found a strong correlation under different osmotic conditions (Figures 5J, Figures S5E and  
426 S5I). When we collated all data, we found a strikingly conserved relationship between lamin A  
427 localization and YR, independent of lamin A expression, osmotic pressure, or even nuclear volume  
428 (Figure 5K). In lamin A overexpressed and WT cells, under 960 kPa osmotic pressure Lm remains  
429 intact with negligible redistribution and YAP remains cytoplasmic (Figure 5M). However, under  
430 1.62 MPa pressure membrane Lm is remarkably redistributed followed by YAP localization  
431 (Figure 5N). These findings suggest that the lamin A distribution might be a central regulatory  
432 variable for YAP localization.

433  
434 To further determine if lamin A redistribution is indeed driving YAP translocation, we quantified  
435 how changes in Lm due to nuclear compression impacts YAP activity, finding a strong correlation  
436 between lamin A redistribution ( $\Delta Lm$ ) and YAP activity under diverse osmotic conditions (Figure  
437 5L, Figures S5F and S5J). Collating all data of osmotic compression, we found a pronounced  
438 relationship between YR changes and lamin A redistribution for all examined experimental  
439 conditions (Figure 5O), suggesting that lamin A redistribution describes YAP nuclear localization  
440 independent of nuclear stiffness mediated by overall lamin A expression levels. These findings

441 shed new light on mechanosensing mechanism mediated by nuclear deformation and lamin A  
 442 reorganization.  
 443

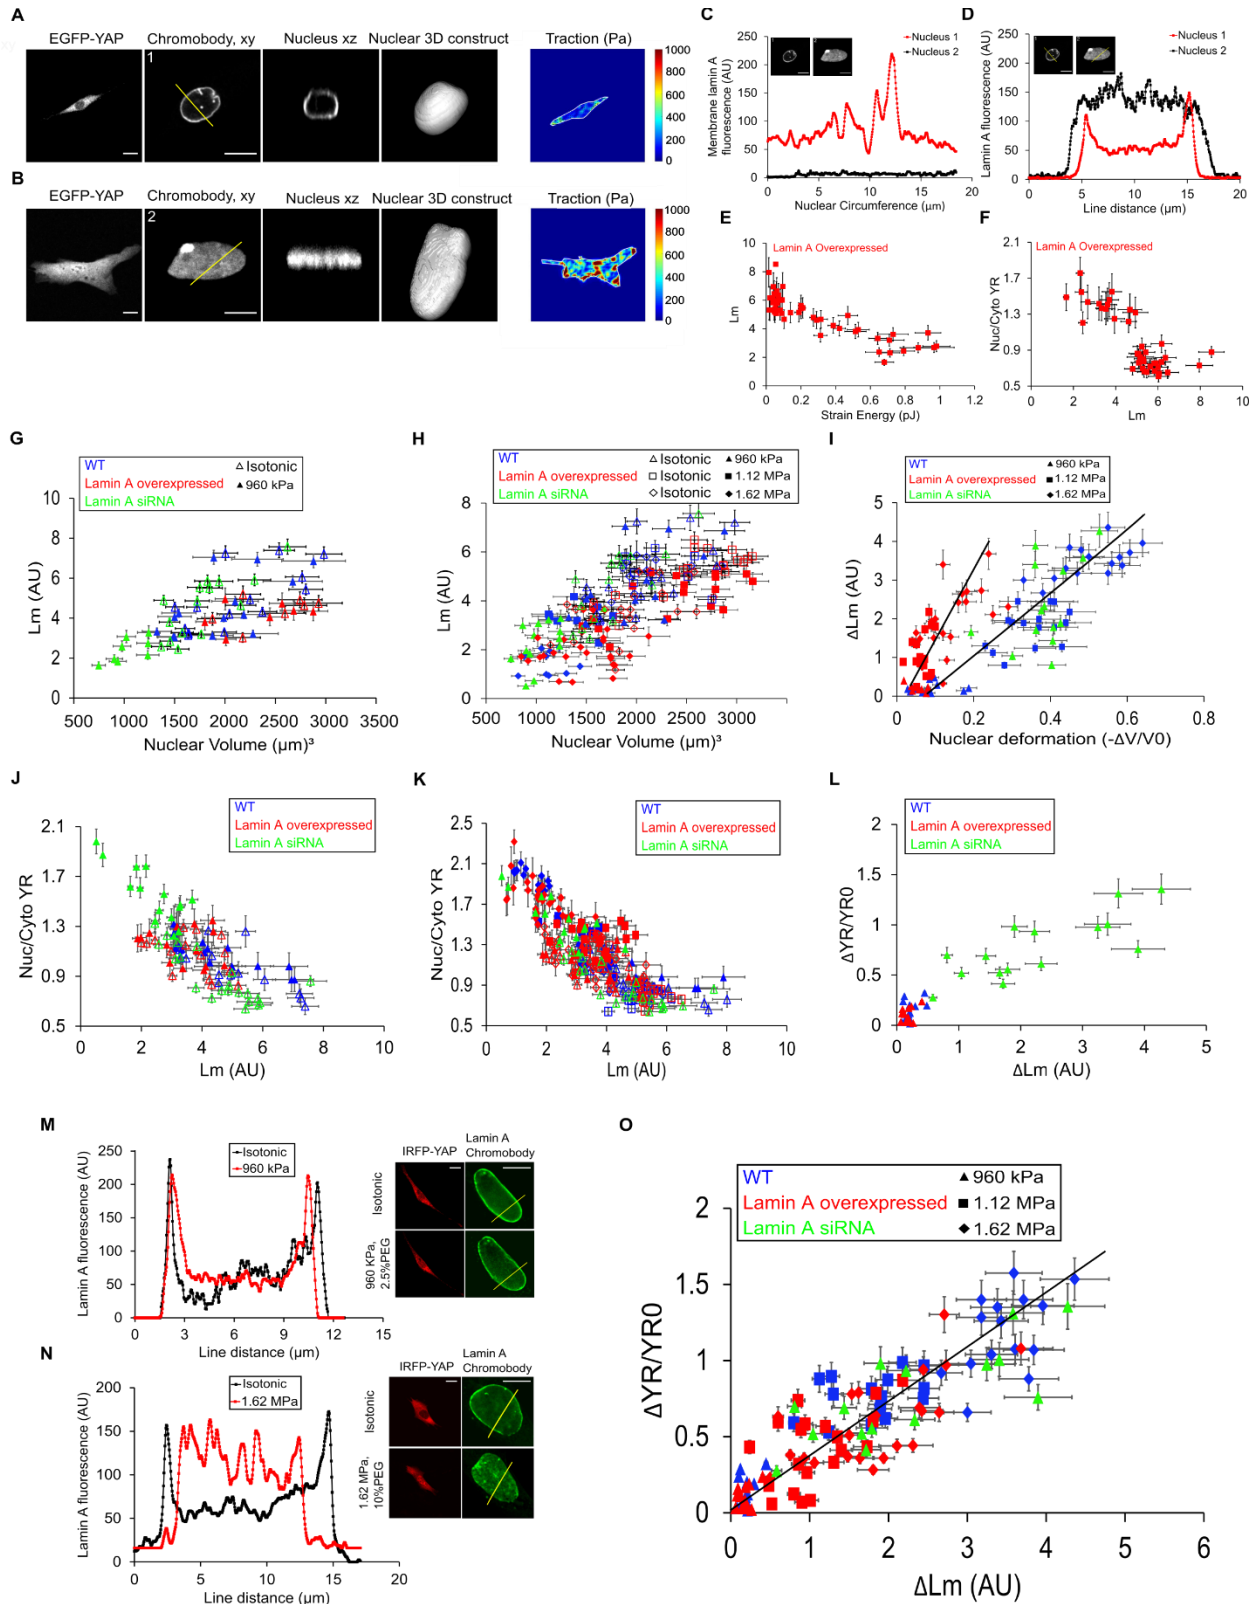

444



445 **Figure 5. Lamin A redistributes from the nuclear membrane to nucleoplasm under**  
446 **deformation and directly regulates YAP localization.**

447 A) Example of YAP localization in low contractile lamin A overexpressed cell with high nuclear  
448 volume and high lamin A localized in the nuclear membrane, B) Example of YAP nuclear  
449 localization in high contractile lamin A overexpressed cell with more flattened nucleus and even  
450 distribution of lamin A throughout the nucleus, C) Quantification of total lamin A fluorescence at  
451 the nuclear membrane for nucleus 1 (red line) and nucleus 2 (black line) shown in (A) and (B), D)  
452 Lamin A fluorescence along a chord crossing nucleus 1 and 2 in (A) and (B), E) Lm for lamin A  
453 overexpressed cells vs Strain Energy ( $n > 15$  cells), F) YR vs Lm for the same cells as in (E), G)  
454 Lm vs nuclear volume for WT, lamin A siRNA, and lamin A overexpressed cells before (open  
455 markers) and after (solid markers) applying 960 kPa pressure ( $n > 10$  cells per each condition), H)  
456 Collating all data of Lm vs nuclear volume for WT, lamin A siRNA and lamin A overexpressed  
457 cells under different experimental conditions ( $n > 15$  cells per each condition), I) Collating all data  
458 of Lm change (initial Lm – Lm after adding PEG) as a function of nuclear deformation for the  
459 same cells as in (H), J) YR vs Lm for WT, lamin A siRNA, and lamin A overexpressed cells before  
460 (open markers) and after applying 960 kPa pressure (solid markers) ( $n > 10$  cells per each  
461 condition), K) Collating all data of YR vs Lm before (open markers) and after (solid markers)  
462 adding different concentrations of PEG for the same cells as in (H) ( $n > 10$  cells per each condition),  
463 L) YR change vs Lm change for WT, lamin A overexpressed and, lamin A siRNA cells under 960  
464 kPa pressure for the same cells as in (G) ( $n > 10$  cells), M) Representative of YAP localization and  
465 lamin A fluorescence along a chord crossing nucleus of an example cell before (black line) and  
466 after (red line) applying 960 kPa pressure, N) YAP localization and lamin A fluorescence along a  
467 chord crossing nucleus of another cell before (black line) and after (red line) applying 1.62 MPa  
468 pressure, O) Collating all data of YR changes vs Lm changes ( $\Delta$ Lm) for WT, lamin A siRNA, and  
469 lamin A overexpressed cells under same conditions as in (K) ( $n > 15$  cell per each condition). Scale  
470 bars show 10  $\mu$ m for the nuclei and 20  $\mu$ m for the cells. Error bars indicate standard deviation  
471 (SD).

472

473 **Discussion**

474 Diverse studies have examined how YAP activity is impacted by mechanical stimuli ranging from  
475 substrate stiffness to applied forces (Aragona et al., 2013; Dupont et al., 2011; Elosegui-Artola et  
476 al., 2017; Nardone et al., 2017; Wang et al., 2016). Here we demonstrated how contractility  
477 modulates nuclear deformation and revealed a direct relationship between YAP mechanosensation  
478 and lamin A redistribution. Furthermore, we showed that in contrast to previous studies (Aragona  
479 et al., 2013; Das et al., 2016; Elosegui-Artola et al., 2017; Fischer et al., 2016), substrate stiffness  
480 does not determine YAP activity on PAA or PDMS surfaces. We showed that only in very small  
481 rounded cells is YAP principally cytoplasmic (Figure 1G), whereas in spread cells YAP is  
482 dynamically distributed between the cytoplasm and the nucleus, independent of substrate stiffness  
483 (Figures 1E and 1G). Examining cell contractility, we found that YAP activity appeared correlated  
484 with work regardless of substrate stiffness. Furthermore, we showed that contractility varies during

485 cell movement, that YAP activity and contractility are highly correlated temporally, leading to  
486 dynamic localization of YAP in single cells independent of substrate moduli (Figures 2B and 2D).

487  
488 We measured that contractile work compresses the nucleus in a LINC complex mediated way.  
489 This nuclear compression in turn regulates YAP localization, which is consistent with the idea of  
490 nuclear pore complex opening mediated by nuclear tension (Elosegui-Artola et al., 2017) (Figures  
491 3B-3E). We also varied nuclear stiffness by modulating lamin A expression levels, which changes  
492 the amount of nuclear compression under applied physical forces. We found that for a given cell  
493 contractility, cells with stiffer nuclei had lower nuclear compression, larger nuclear volume, and  
494 lower YRs compared to those with softer nuclei (Figures 3I-3K). These findings suggest that  
495 nuclear deformation specifically rather than applied stress mediates YAP localization. Moreover,  
496 our results are consistent with previous reports of lamin A overexpression and nuclear stiffening  
497 decreasing YAP nuclear transport (Elosegui-Artola et al., 2017; Harada et al., 2014; Swift et al.,  
498 2013). However, we observed unexpectedly higher YAP nuclear localization in larger nuclear  
499 volumes in lamin A overexpressed cells (Figures 4K and 4L), leading us to examine the interplay  
500 between YAP localization and the lamin A distribution.

501  
502 We found that lamin A localization is mechanosensitive, and that either contractile work or  
503 osmotic force induced nuclear deformation causes lamin A to delocalize from the nuclear  
504 membrane and to enter the nuclear interior. Recent studies also observed varied localization of A-  
505 type lamins with some at the nuclear periphery and some in the nuclear interior depending on cell  
506 cycle, differentiation and mechanical cues (Buxboim et al., 2014; Dechat et al., 2010; Gesson et  
507 al., 2014; Naetar et al., 2017; Swift et al., 2013; Turgay et al., 2017); however, the pathways  
508 involved in nucleoplasmic lamin A regulation and the role of intranuclear lamin A in  
509 mechanosensing and transcription activation have remained open questions. While the molecular  
510 mechanisms behind lamin A disassociation from the nuclear membrane remains unclear, we  
511 speculate that this may be related to the local nuclear membrane curvature, and that under high  
512 bending curvature that lamin A may delaminate from the nuclear membrane (Figure 6). While  
513 nuclear membrane tension has been implicated as a mechanism for YAP regulation, previous work  
514 failed to stimulate YAP nuclear localization after applying hypoosmotic solutions that swell nuclei  
515 and place the nuclear membrane under tension (Elosegui-Artola et al., 2017); this suggests that  
516 nuclear tension alone may not completely describe YAP nuclear localization. Our description of  
517 mechanosensitive lamin A redistribution under compression would potentially explain why YAP  
518 activation only occurs under nuclear flattening but not under nuclear swelling.

519  
520 Quantifying this redistribution of lamin A from nuclear membrane to nuclear interior, we found  
521 that it matched the YAP redistribution in the cell, independent of all other experimental conditions  
522 (Figures 5K and 5O). The mechanistic role of lamin A in YAP transport remains unclear, however,  
523 it is likely that lamin A interacts with nuclear pore complexes (NPCs). Many studies have reported  
524 that lamin A plays a role in regulating the NPC distribution during the cell cycle, and does so in a

525 differentiation dependent way (Guo and Zheng, 2015; Maeshima et al., 2006). Indeed, an inverse  
526 correlation between lamin A distribution and NPC density has been observed in the nuclear  
527 membrane (Maeshima et al., 2006), suggesting a potential relationship between lamin A  
528 localization and YAP translocation, which is consistent with our delamination perspective.  
529 Moreover, some transcriptionally active euchromatin regions are associated with nucleoplasmic  
530 lamin A (Dechat et al., 2000; Gesson et al., 2016), suggesting that a mechanosensitive  
531 redistribution of lamin A may directly impact gene expression and transcription activation.

532

533 Our study suggests that nuclear-deformation mediated lamin A reorganization may be a main non-  
534 Hippo-dependent YAP regulatory mechanism. This novel mechanism incorporates previously  
535 identified mechanical stimuli of YAP regulation, including substrate stiffness, cell contractility,  
536 nuclear deformation and nuclear mechanics. This is also consistent with previous reports of lamin  
537 A reduction being related to increased YAP activity in cancer progression (Alhudiri et al., 2019;  
538 Irianto et al., 2016; Nukuda et al., 2015; Warren et al., 2018; Zanconato et al., 2016a; Zanconato  
539 et al., 2016b) We anticipate this link between nuclear stiffness, nuclear deformation, lamin A, and  
540 YAP activity will offer new insight and therapeutic strategies for other diverse diseases associated  
541 with modified nuclear mechanics and cellular dysfunction, including aging disorders (Capo-Chichi  
542 et al., 2011; Verstraeten et al., 2008), Emery-Dreifuss Muscular Dystrophy (Bonne et al., 1999a),  
543 and Hutchinson-Gilford progeria syndrome (De Sandre-Giovannoli et al., 2003); A clearer  
544 understanding of mechanical YAP regulation may also provide better strategies for directing stem  
545 cell engineering and homeostasis. Our proposed interplay between YAP, nuclear volume, and  
546 nuclear deformation are consistent with previous reports of cell compression (Bao et al., 2019;  
547 Guo et al., 2017; Pan et al., 2018) and high cell contractility (Buxboim et al., 2014; Swift and  
548 Discher, 2014; Swift et al., 2013) mediating osteogenic differentiation as a result of YAP  
549 activation.

550

551

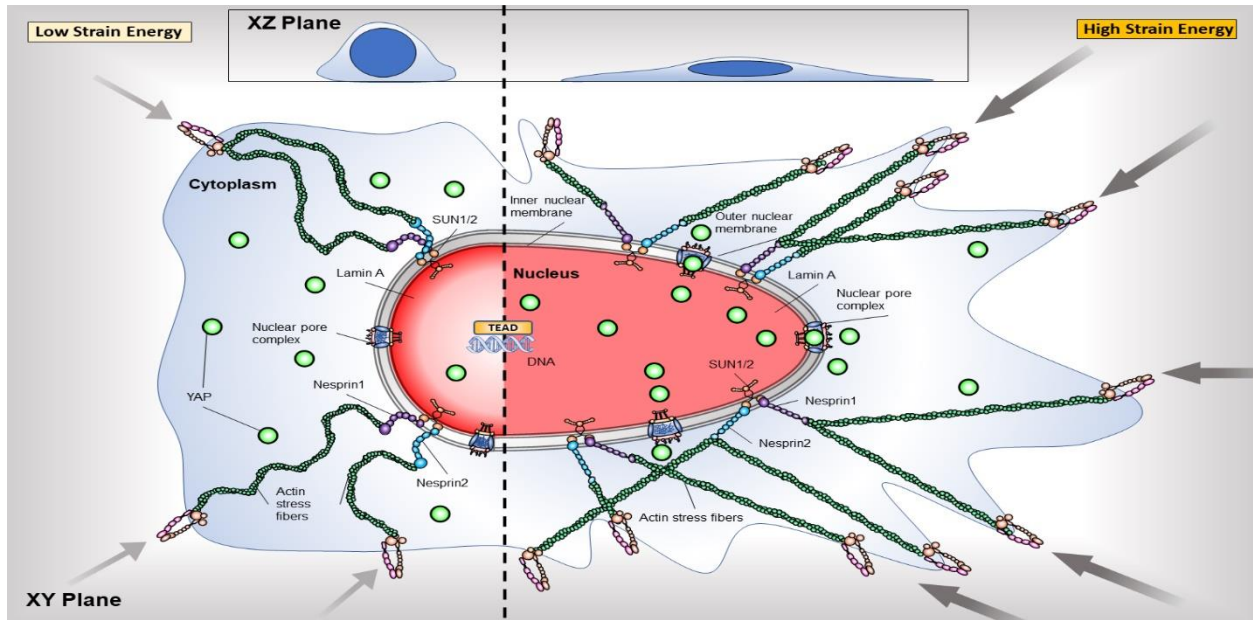

552  
553

554 **Figure 6. Proposed model regulating YAP nuclear localization.** Right part of proposed model  
555 is representative of high tensional state of the nucleus with stretched nuclear pores and evenly  
556 distributed lamin A (red color) throughout the nucleus, inducing YAP nuclear localization. Left  
557 part of the proposed model is representative of lower tension state and less deformed nucleus with  
558 lamin A accumulated in the nuclear periphery (darker red) reducing YAP nuclear localization.

559  
560

### 561 **Acknowledgements:**

562 AJE acknowledges support from grants NSERC RGPIN/05843-2014, NSERC EQPEQ/472339-  
563 2015, CIHR Grant # 143327, Canadian Foundation for Innovation Projects #32749, #39725. The  
564 authors thank Xavier Trepant and Shanahan Catherine for the kind gifts of plasmids (iRFP-YAP,  
565 dominant-negative EGFP-Nesprin1-KASH and EGFP-Nesprin2-KASH), and Qiuping Zhang and  
566 Johanan Idicula for helpful discussions. The authors sincerely thank Katherine Ehrlicher and  
567 Philippe Bergeron for their assistance in copy-editing the manuscript.

568

### 569 **Author contributions:**

570 Conceptualization, A.J.E., N.K.; Methodology- development, L.K.S., H.Y.; Methodology-  
571 application, N.K.; Plasmid purifications and sequencing, A.G., C.S., L.K.S.; Investigation, N.K.;  
572 Writing- original draft, N.K.; Writing- review and editing, N.K., A.J.E., L.K.S., C.S., A.G.,  
573 C.M.; Funding acquisition-A.J.E.; Resources, A.J.E; Supervision, A.J.E.

574

### 575 **Conflict of interest statement:**

576 The authors declare that no conflict of interests exists.

577

## 578 **Materials and Methods**

### 579 **Fabrication of PDMS substrates**

580 To determine the effects of substrate rigidity on dynamic localization of EGFP-YAP protein,  
581 polydimethylsiloxane (PDMS) substrates with different stiffnesses were prepared as described  
582 previously (Au - Yoshie et al., 2019; Yoshie et al., 2018). In brief, PDMS solutions were supplied  
583 by mixing same weight ratio of component A and B of commercial PDMS (NuSil® 8100, NuSil  
584 Silicone Technologies, Carpinteria, CA) with different concentrations of Sylgard 184 PDMS  
585 crosslinking agent (Dimethyl, methylhydrogen siloxane, which contains methyl terminated silicon  
586 hydride units) to obtain substrates with various stiffnesses (Table 1). Then, 170  $\mu$ l of each solution  
587 was applied to the clean 24\*24 mm glass coverslips and cured at 100 °C for two hours. For traction  
588 force microscopy, prepared PDMS substrates were coated with 1  $\mu$ m thick layer of fiduciary  
589 particles using spin coater (Laurell Technologies, WS-650 Spin Processor) and incubated at 100  
590 °C for an hour.

591

| Additional crosslinker concentration (weight %) | Young's modulus (kPa) |
|-------------------------------------------------|-----------------------|
| 0                                               | 0.3 $\pm$ 0.054       |
| 0.1                                             | 2 $\pm$ 0.062         |
| 0.2                                             | 5 $\pm$ 0.048         |
| 0.36                                            | 12 $\pm$ 0.71         |
| 0.45                                            | 18 $\pm$ 0.68         |
| 1.8                                             | 100 $\pm$ 2.8         |

592

593 **Table 1.** Young's moduli of different PDMS substrates containing different concentrations of  
594 Sylgard 184 crosslink agent.

595

### 596 **Polyacrylamide Fabrication**

597 Polyacrylamide (PAA) gels were prepared based on previously described protocol (Yeung et al.,  
598 2005). PAA gel solutions were prepared with varying concentrations of acrylamide and bis-  
599 acrylamide mixed with ammonium per sulfate (APS), TEMED and fluorescent fiduciary beads for  
600 traction microscopy (Table 1). Acrylamide and bisacrylamide solutions were mixed and degassed  
601 for 15-20 minutes under fume hood. Further APS and TEMED were added to the gel solutions and  
602 mixed by pipetting. The final solution was added onto the hydrophobic glass slide (treated with  
603 RainX) and a coverslip was placed gently on top of the gel drop. After polymerization, the gel  
604 sandwiches were placed inside MiliQ water bath and then the glass slides were gently removed.

605

| (kPa) | Acrylamide % | BIS % | Type | Acrylamide (ul) | BIS (ul) | PBS (ul) | APS (ul) | TEMED (ul) | Beads (ul) |
|-------|--------------|-------|------|-----------------|----------|----------|----------|------------|------------|
| 1.081 | 3            | 0.1   | AFM  | 75              | 50       | 835      | 10       | 10         | 20         |

|        |   |       |     |     |       |       |    |    |    |
|--------|---|-------|-----|-----|-------|-------|----|----|----|
| 5.008  | 4 | 0.3   | AFM | 100 | 150   | 710   | 10 | 10 | 20 |
| 9.694  | 8 | 0.1   | AFM | 200 | 50    | 710   | 10 | 10 | 20 |
| 15.279 | 8 | 0.15  | AFM | 200 | 75    | 685   | 10 | 10 | 20 |
| 20.85  | 8 | 0.225 | AFM | 200 | 112.5 | 647.5 | 10 | 10 | 20 |
| 23.838 | 8 | 0.3   | AFM | 200 | 150   | 610   | 10 | 10 | 20 |
| 40.397 | 8 | 0.48  | AFM | 200 | 240   | 520   | 10 | 10 | 20 |

606

607 **Table 2.** Young's moduli of different PAA hydrogels containing different concentrations of  
608 acrylamide, Bis, APS and TEMED.

609

### 610 **Surface modification**

611 In order to covalently bind fibronectin to PDMS or PAA substrates, Sulfo-SANPAH  
612 (ThermoFisher Scientific) solution dissolved in 100 mM HEPES was added on top of the  
613 substrates and they were exposed to UV for 2 minutes. After UV activation, Sulfo-SANPAH  
614 solutions were removed and 5 µg/ml fibronectin (Sigma) solution diluted in PBS was added on to  
615 of the samples, followed by incubation in room temperature for 9-12 hours. Finally, fibronectin  
616 solutions were removed, and substrates were rinsed with PBS 3 times. After UV sterilization of  
617 coated substrates, trypsinized cells were seeded on top of the samples and they were allowed to  
618 adhere overnight.

619

### 620 **Cell culture**

621 NIH-3T3 *Mus musculus*, mouse cell line was obtained from ATCC and cultured in Dulbecco's  
622 modified Eagle medium (DMEM) (Wisent) supplemented with 10% fetal bovine serum (FBS)  
623 (Wisent) and 1% Penicillin-Streptomycin antibiotic (P/S) (Thermo Fisher). The cells were  
624 incubated at 37 °C in 5% CO<sub>2</sub> environment and, they were allowed to grow on the substrates for  
625 18 hours before imaging.

626

### 627 **Transfection and Confocal microscopy of live cells**

628 To quantitatively track EGFP-YAP mechanotransduction with time, we transiently transfected  
629 NIH-3T3 cells with 2 plasmids, pEGFP-yap-C3-hYAP1 (Addgene, plasmid #17843) (Basu et al.,  
630 2003) and EBFP2-Nucleus-7 (nuclear localization signal, Addgene, plasmid #55249), using  
631 GenJet transfection reagent (Signagen). 18-24 hours later, cells were seed on fibronectin-coated  
632 PDMS, PAA and glass substrates and after cell attachment, they were transferred to a lab-built  
633 heated stage perfused with 5% CO<sub>2</sub> and mounted on a confocal microscope (Leica TCS SP8 with  
634 a 10x objective). With this setup, we could image cells with transmission and fluorescence  
635 microscopy for extended periods, while maintaining a controlled culture environment.

636

637 In order to examine the effects of LINC complex on contractile and force mediated nuclear  
638 deformation and YAP translocation, we transfected the cells with two dominant-negative GFP-

639 Nesprin1-KASH and GFP-Nesprin2-KASH (DNK1/2) plasmids which were kindly provided by  
640 Dr. Catherin Shanahan's laboratory (King's College, London) (Lombardi et al., 2011). Previously  
641 it has been shown that overexpression of dominant-negative Nesprin-KASH disrupts interaction  
642 between nesprins and SUN proteins at nuclear envelop by nonspecific binding to endogenous SUN  
643 proteins resulting in mislocalization of nuclear nesprins and disruption of LINC complex  
644 (Elosegui-Artola et al., 2017; Lombardi et al., 2011). To specify YAP localization, at the same  
645 time we transfected the cells with iRFP-YAP which was a gift from Xavier Trepate (Institute for  
646 bioengineering of Catalonia (IBEC), Barcelona) and EBFP-Nucleus to avoid any crosstalk  
647 between GFP-DNK1/2 and YAP and 18 hours after transfection we seeded the cells on PDMS  
648 substrates coated with fluorescent beads followed by incubation at 37 °C for 12 hours. Finally,  
649 alive transfected cells seeded on PDMS traction substrates were imaged overtime using confocal  
650 Leica SP8 with 10x objective. To measure traction stress and strain energy at the same time,  
651 fluorescent beads coating PDMS and PAA substrates also were imaged along with EGFP-YAP  
652 transfected cells and EBFP-Nucleus.

653  
654 To quantify YAP nuclear to cytoplasmic ratio, image segmentation was performed using matlab  
655 code for every time frame to measure the ratio of EGFP-YAP fluorescence inside the nucleus to  
656 EGFP-YAP fluorescence in the cytoplasm during cell movement on PDMS, PAA and glass  
657 substrates.

658  
659 **Immunostaining**  
660 To compare endogenous YAP localization with EGFP-YAP, we fixed the cells with 4%  
661 paraformaldehyde for 15 min in room temperature and washed 3 times with PBS. We stained the  
662 nuclei with 0.5 µl/ml bisBenzimide H 33342 trihydrochloride (Sigma) and after 20 minutes, cells  
663 were washed with PBS. The cells were permeabilized with 0.1% Triton X-100 diluted in PBS for  
664 10 minutes. To avoid any nonspecific hydrophobic binding, 2% bovine serum albumin (BSA) was  
665 added to the cells and incubated for 30 minutes in room temperature. After washing with PBS, we  
666 made solution of 10 µg/ml of YAP mouse monoclonal antibody (sc101199, Santa Cruz) and  
667 donkey Anti-Mouse IgG H&L (Alexa Fluor® 647) secondary antibody (ab150107, abcam) in BSC  
668 separately. The cells were separately incubated first with primary antibody and then with the  
669 secondary antibody for an hour in room temperature. Fluorescence images were acquired with a  
670 Leica SP8 confocal microscope and endogenous YAP ratio values were measured using image  
671 segmentation and quantifying the ratio of YAP intensity inside the nucleus to YAP intensity in  
672 cytoplasm, and then the values were compared with YR values obtained from EGFP-YAP  
673 transfected cell.

674  
675 **Cell spread area**  
676 To examine the effects of cell spread area, we started confocal imaging 10 minutes after seeding  
677 the EGFP-YAP and EBFP-Nucleus transfected cells on fibronectin-coated PDMS substrates and  
678 continued imaging for 18 hours using confocal Leica SP8 with low magnification (x10 objective).

679 Then we quantified YAP ratio and cell projected area for every time frame acquired by confocal  
680 microscope. The projected cell area of the cells was determined with Fiji software.

681

### 682 **Traction Force Microscopy**

683 Active contractile stress in actin cytoskeleton were quantified using Traction Force Microscopy  
684 (TFM) as previously described (Yoshie et al., 2018). In brief, EGFP-YAP transfected NIH 3T3  
685 cells were cultured on fibronectin coated compliant PDMS substrates of known moduli and a thin  
686 PDMS layer of embedded fiduciary fluorescent particles was spin coated on the top surface. After  
687 12 hours incubation at 37 °C, EGFP-YAP transfected cells and fluorescent particles were imaged  
688 simultaneously over time using Leica TCS SP8 confocal microscope with low magnification  
689 ( $\times 10$ /NA 0.4 air objective) at a resolution of 0.28  $\mu\text{m}/\text{pixel}$ . The reference images of the particles  
690 were acquired at the end of the experiment by detaching the cells from the substrate surface.

691

692 Cell-substrate traction stresses and strain energies were calculated for each acquired time frame as  
693 described previously (Butler et al., 2002). Briefly, local displacements of the fiduciary particles  
694 were calculated by comparing the particle positions with cells on the substrate and reference  
695 particle positions without cells. From the particle displacement and known Young's moduli of the  
696 PDMS substrate, cellular contractile stresses and strain energies were calculated. Quantifying YAP  
697 ratio based of above EGFP-YAP and EBFP-Nucleus images for the relevant time frames, we could  
698 measure YAP localization for every contractile state of the cells on PDMS substrates with different  
699 stiffnesses.

700

### 701 **Pharmacologic treatments**

702 To further quantify the effects of contractile stress and work (strain energy) on YAP subcellular  
703 translocation, we started imaging of the EGFP-YAP transfected cells and fluorescent particles on  
704 top of PDMS substrates with different stiffnesses before any treatment and then we added 1.5  $\mu\text{M}$   
705 Cytochalasin D (CytoD, ThermoFisher Scientific) to the cells which depolymerize actin filaments  
706 and decrease contractility. We then continued imaging for another 2 hours after adding CytoD  
707 followed by killing the cells at the end of the experiment for the reference images required for  
708 traction stress analysis. Quantifying YAP ratio and relevant traction stress as well as strain energy  
709 for each time frame before and after actin filaments depolymerization enable us to track changes  
710 in YAP localization in real time during losing cells' contractilities in real time. Moreover, we  
711 applied 50  $\mu\text{M}$  ROCK inhibitor (Y27632, abcam) to nontreated EGFP-YAP transfected cells  
712 seeded on different PDMS substrates to investigate how inhibition of actomyosin activity affects  
713 dynamic movements of YAP in alive single cells. We continued imaging for 6 hours after ROCK  
714 inhibitor treatment and at the end of experiment the cells were detached for traction analysis.

715

### 716 **Quantification and modulating of lamin A expression**

717 To quantify the total lamin A present in the nuclei, all the cells were transfected with GFP tagged  
718 lamin A Chromobody (Chromtek) which facilitates real time imaging of lamin A by labeling the



719 total lamin A without interfering with its function and distribution in the nuclei (Srivastava et al.,  
720 2019; Zolghadr et al., 2012). As previously it has been verified that lamin A Chromobody is the  
721 accurate quantitative metric of lamin A expression and distribution (Srivastava et al., 2019), we  
722 transfected NIH 3T3 cells with GFP-Chromobody to quantify lamin A expression and distribution.  
723 To modulate lamin A expression in GFP-Chromobody transfected NIH 3T3 cells, we  
724 overexpressed lamin A by transiently transfecting the intact cells with m-Cherry tagged plasmid  
725 DNA for lamin A which was a gift from Michael Davison (Addgene, plasmid # 55068). To surpass  
726 lamin A expression, we transfected the cells with RFP tagged inducible shRNA construct for lamin  
727 A (Dharmacon) by adding 0.5 µg/ml doxycycline to WT cells transfected with GFP tagged lamin  
728 A chromobody (Matsushita et al., 2013), followed by incubation at 37 °C for 72 hours.

729  
730 After modulating lamin A expression, cells were seeded on the fibronectin-coated glasses and after  
731 24 hours incubation they were imaged using confocal Leica SP8 microscope with x63/1.4 NA oil  
732 immersion objective. Lamin A expression level in different cells was assessed by identifying a  
733 mask covering the whole nucleus and then quantifying total GFP-Chromobody's fluorescence in  
734 the nuclear mask using MATLAB code.

735  
736 In order to examine lamin A intensity localized in the nuclear membrane, we identified a mask  
737 that covered only the nuclear membrane, and GFP-Chromobody's fluorescence was only  
738 quantified in the defined nuclear membrane mask (Lm).

739  
740 To study the effects of lamin A expression and distribution on YAP localization, all the cells were  
741 transfected with iRFP YAP as well as EBFP- Nucleus at the same time when we were transfecting  
742 GFP-Chromoboy and modulating lamin A expression. 18 hours after transfection and 72 hours  
743 after doxycycline treatment cells were seeded on fibronectin-coated glass and PDMS traction  
744 substrates, followed by 24 hours incubation at 37 °C and 5% CO<sub>2</sub> environment. To quantify YAP  
745 ratio, total lamin A expression, lamin A localized in the nuclear membrane and contractility, iRFP-  
746 YAP, EBFP-Nucleus, GFP-Chromobody and fluorescent beads were imaged by confocal  
747 microscope with 63X/1.4 NA oil immersion objective.

### 748 749 **3-D volume measurement of nuclei**

750 In order to measure nuclear volume and nuclear deformation, XYZ stacks of EBFP tagged nuclei  
751 with a z-step size of 0.5 µm were imaged using Leica SP8 confocal microscope with x63/1.4NA  
752 oil immersion objective lens. The 3D visualization and quantification were performed by Fiji  
753 software. To quantify nuclear volume, the stacks were thresholded based on the top and bottom  
754 of the nuclei and then the number of voxels of the thresholded region was counted and multiplied  
755 by the size of each voxel using Fiji software. To investigate the role of cell contractility in nuclear  
756 deformation and YAP localization in WT, lamin A overexpressed and lamin A siRNA cells, we  
757 employed z stacks imaging of the EBFP tagged nuclei of the single cells seeded on PDMS  
758 substrates coated with fluorescent particles at the same time when iRFP-YAP, EBFP-Nucleus,

759 GFP-Chromobody and fluorescent particles underneath of each cell were imaged. To analyze  
760 traction stresses and strain energies of the cells, at the end of the experiment, cells were detached  
761 for the null force image.

762

763 We repeated the same experiment for LINC disrupted cells and CytoD treated cells to investigate  
764 how LINC complex disruption and actin filament depolymerization affect contractile force  
765 mediated nuclear deformation.

766

### 767 **Osmotic compression**

768 To examine how externally deform nuclei regulated lamin A distribution and YAP activation,  
769 hyperosmotic pressure was applied using different concentrations of 400Da polyethylene glycol  
770 (PEG 400, Sigma) (Guo et al., 2017; Khavari and Ehrlicher, 2019; Srivastava et al., 2019). First,  
771 XYZ stacks of EBFP-Nucleus, iRFP-YAP and GFP-Chromobody of the cells seeded on the  
772 fibronectin-coated glasses and PDMS substrates were imaged using confocal microscope with  
773 x63/1.4 NA. Then, different concentrations of PEG400 were added to the cells and again z stacks  
774 of the nuclei as well as iRFP-YAP and GFP-Chromobody were imaged (Table 3). We then  
775 quantified nuclear volume, YAP ratio (YR) and nuclear membrane lamin A (Lm) after adding  
776 different concentrations of PEG400 to the cells and compared them with initial values obtained in  
777 isotonic condition to investigate how applied force deforms nucleus, redistribute lamin A and  
778 activates YAP.

779

| PEG concentration wt% | Osmotic pressure (MPa) |
|-----------------------|------------------------|
| 2.5                   | 0.96                   |
| 5                     | 1.12                   |
| 10                    | 1.62                   |

780

781 **Table 3.** Quantified osmotic pressures relevant to different concentrations of PEG400.

782

### 783 **Quantification of nuclear bulk moduli:**

784 To determine how nuclear deformability influenced the required force to activate YAP, we  
785 modulated lamin A expression level as mentioned above and 18 hours after seeding the cells on  
786 fibronectin-coated glasses, we applied different hyperosmotic pressures using different  
787 concentrations of PEG400. We acquired XYZ stacks of EBFP-Nucleus before and after adding  
788 PEG. We then quantified change in the nuclear volume when the cells with different lamin A  
789 expression were exposed to different hyperosmotic shocks and using the following equation,

790

$$791 B = -\Delta P / (\Delta V / V_0)$$

792

793 where  $B$  = bulk modulus,  $\Delta P$  = osmotic pressure,  $\Delta V$  = change in nuclear volume and  $V_0$  = Initial  
794 nuclear volume, we calculated nuclear bulk modulus (Khavari and Ehrlicher, 2019; Srivastava et  
795 al., 2019).

796

## 797 **References**

- 798 Alhudiri, I.M., Nolan, C.C., Ellis, I.O., Elzagheid, A., Rakha, E.A., Green, A.R., and Chapman,  
799 C.J. (2019). Expression of Lamin A/C in early-stage breast cancer and its prognostic value.  
800 *Breast Cancer Research and Treatment* *174*, 661-668.
- 801 Amano, M., Nakayama, M., and Kaibuchi, K. (2010). Rho-kinase/ROCK: A key regulator of the  
802 cytoskeleton and cell polarity. *Cytoskeleton (Hoboken)* *67*, 545-554.
- 803 Aragona, M., Panciera, T., Manfrin, A., Giulitti, S., Michielin, F., Elvassore, N., Dupont, S., and  
804 Piccolo, S. (2013). A mechanical checkpoint controls multicellular growth through YAP/TAZ  
805 regulation by actin-processing factors. *Cell* *154*, 1047-1059.
- 806 Athirasala, A., Hirsch, N., and Buxboim, A. (2017). Nuclear mechanotransduction: sensing the  
807 force from within. *Current opinion in cell biology* *46*, 119-127.
- 808 Au - Yoshie, H., Au - Koushki, N., Au - Molter, C., Au - Siegel, P.M., Au - Krishnan, R., and  
809 Au - Ehrlicher, A.J. (2019). High Throughput Traction Force Microscopy Using PDMS Reveals  
810 Dose-Dependent Effects of Transforming Growth Factor- $\beta$  on the Epithelial-to-  
811 Mesenchymal Transition. *JoVE*, e59364.
- 812 Bao, M., Xie, J., Katoele, N., Hu, X., Wang, B., Piruska, A., and Huck, W.T.S. (2019). Cellular  
813 Volume and Matrix Stiffness Direct Stem Cell Behavior in a 3D Microniche. *ACS Applied*  
814 *Materials & Interfaces* *11*, 1754-1759.
- 815 Basu, S., Totty, N.F., Irwin, M.S., Sudol, M., and Downward, J. (2003). Akt phosphorylates the  
816 Yes-associated protein, YAP, to induce interaction with 14-3-3 and attenuation of p73-mediated  
817 apoptosis. *Molecular cell* *11*, 11-23.
- 818 Benham-Pyle, B.W., Pruitt, B.L., and Nelson, W.J. (2015). Cell adhesion. Mechanical strain  
819 induces E-cadherin-dependent Yap1 and beta-catenin activation to drive cell cycle entry. *Science*  
820 (New York, NY) *348*, 1024-1027.
- 821 Bertacchini, J., Beretti, F., Cenni, V., Guida, M., Gibellini, F., Mediani, L., Marin, O., Maraldi,  
822 N.M., de Pol, A., Lattanzi, G., *et al.* (2013). The protein kinase Akt/PKB regulates both prelamin  
823 A degradation and Lmna gene expression. *FASEB journal : official publication of the Federation*  
824 *of American Societies for Experimental Biology* *27*, 2145-2155.
- 825 Bonne, G., Barletta, M.R.D., Varnous, S., Bécane, H.-M., Hammouda, E.-H., Merlini, L.,  
826 Muntoni, F., Greenberg, C.R., Gary, F., Urtizbera, J.-A., *et al.* (1999a). Mutations in the gene  
827 encoding lamin A/C cause autosomal dominant Emery-Dreifuss muscular dystrophy. *Nature*  
828 *genetics* *21*, 285-288.
- 829 Bonne, G., Di Barletta, M.R., Varnous, S., Becane, H.M., Hammouda, E.H., Merlini, L.,  
830 Muntoni, F., Greenberg, C.R., Gary, F., Urtizbera, J.A., *et al.* (1999b). Mutations in the gene  
831 encoding lamin A/C cause autosomal dominant Emery-Dreifuss muscular dystrophy. *Nature*  
832 *genetics* *21*, 285-288.
- 833 Bouzid, T., Kim, E., Riehl, B.D., Esfahani, A.M., Rosenbohm, J., Yang, R., Duan, B., and Lim,  
834 J.Y. (2019). The LINC complex, mechanotransduction, and mesenchymal stem cell function and  
835 fate. *J Biol Eng* *13*, 68-68.

836 Butler, J.P., Tolic-Norrelykke, I.M., Fabry, B., and Fredberg, J.J. (2002). Traction fields,  
837 moments, and strain energy that cells exert on their surroundings. *American journal of*  
838 *physiology Cell physiology* 282, C595-605.

839 Buxboim, A., Irianto, J., Swift, J., Athirasala, A., Shin, J.-W., Rehfeldt, F., and Discher, D.E.  
840 (2017). Coordinated increase of nuclear tension and lamin-A with matrix stiffness outcompetes  
841 lamin-B receptor that favors soft tissue phenotypes. *Molecular biology of the cell* 28, 3333-3348.

842 Buxboim, A., Ivanovska, I.L., and Discher, D.E. (2010). Matrix elasticity, cytoskeletal forces  
843 and physics of the nucleus: how deeply do cells 'feel' outside and in? *Journal of cell science* 123,  
844 297-308.

845 Buxboim, A., Swift, J., Irianto, J., Spinler, Kyle R., Dingal, P.C.Dave P., Athirasala, A., Kao, Y.-  
846 Ruei C., Cho, S., Harada, T., Shin, J.-W., *et al.* (2014). Matrix Elasticity Regulates Lamin-A,C  
847 Phosphorylation and Turnover with Feedback to Actomyosin. *Current Biology* 24, 1909-1917.

848 Capo-Chichi, C., Cai, K., Smedberg, J., Ganjei-Azar, P., Godwin, A., and Xu, X.-X. (2011).  
849 Loss of A-type lamin expression compromises nuclear envelope integrity in breast cancer.  
850 *Chinese journal of cancer* 30, 415-425.

851 Cho, S., Irianto, J., and Discher, D.E. (2017a). Mechanosensing by the nucleus: From pathways  
852 to scaling relationships. *The Journal of cell biology* 216, 305-315.

853 Cho, S., Irianto, J., and Discher, D.E. (2017b). Mechanosensing by the nucleus: From pathways  
854 to scaling relationships. *The Journal of cell biology* 216, 305-315.

855 Cui, Y., Hameed, F.M., Yang, B., Lee, K., Pan, C.Q., Park, S., and Sheetz, M. (2015). Cyclic  
856 stretching of soft substrates induces spreading and growth. *Nature communications* 6, 6333.

857 Das, A., Fischer, R.S., Pan, D., and Waterman, C.M. (2016). YAP Nuclear Localization in the  
858 Absence of Cell-Cell Contact Is Mediated by a Filamentous Actin-dependent, Myosin II- and  
859 Phospho-YAP-independent Pathway during Extracellular Matrix Mechanosensing. *The Journal*  
860 *of biological chemistry* 291, 6096-6110.

861 De Sandre-Giovannoli, A., Bernard, R., Cau, P., Navarro, C., Amiel, J., Boccaccio, I., Lyonnet,  
862 S., Stewart, C.L., Munnich, A., Le Merrer, M., *et al.* (2003). Lamin a truncation in Hutchinson-  
863 Gilford progeria. *Science (New York, NY)* 300, 2055.

864 De Vos, W.H., Houben, F., Kamps, M., Malhas, A., Verheyen, F., Cox, J., Manders, E.M.,  
865 Verstraeten, V.L., van Steensel, M.A., Marcelis, C.L., *et al.* (2011). Repetitive disruptions of the  
866 nuclear envelope invoke temporary loss of cellular compartmentalization in laminopathies.  
867 *Human molecular genetics* 20, 4175-4186.

868 Dechat, T., Gesson, K., and Foisner, R. (2010). Lamina-independent lamins in the nuclear  
869 interior serve important functions. *Cold Spring Harbor symposia on quantitative biology* 75, 533-  
870 543.

871 Dechat, T., Korbei, B., Vaughan, O.A., Vlcek, S., Hutchison, C.J., and Foisner, R. (2000).  
872 Lamina-associated polypeptide 2alpha binds intranuclear A-type lamins. *Journal of cell science*  
873 *113 Pt 19*, 3473-3484.

874 Discher, D.E., Janmey, P., and Wang, Y.L. (2005). Tissue cells feel and respond to the stiffness  
875 of their substrate. *Science (New York, NY)* 310, 1139-1143.

876 Donato, E., Biagioni, F., Bisso, A., Caganova, M., Amati, B., and Campaner, S. (2018). YAP  
877 and TAZ are dispensable for physiological and malignant haematopoiesis. *Leukemia* 32, 2037-  
878 2040.

879 Driscoll, T.P., Cosgrove, B.D., Heo, S.J., Shurden, Z.E., and Mauck, R.L. (2015). Cytoskeletal to  
880 Nuclear Strain Transfer Regulates YAP Signaling in Mesenchymal Stem Cells. *Biophysical*  
881 *journal* 108, 2783-2793.

882 Dupont, S., Morsut, L., Aragona, M., Enzo, E., Giulitti, S., Cordenonsi, M., Zanconato, F., Le  
883 Digabel, J., Forcato, M., Bicciato, S., *et al.* (2011). Role of YAP/TAZ in mechanotransduction.  
884 *Nature* *474*, 179-183.

885 Ehrlicher, A.J., Nakamura, F., Hartwig, J.H., Weitz, D.A., and Stossel, T.P. (2011). Mechanical  
886 strain in actin networks regulates FilGAP and integrin binding to filamin A. *Nature* *478*, 260-  
887 263.

888 Elosegui-Artola, A., Andreu, I., Beedle, A.E.M., Lezamiz, A., Uroz, M., Kosmalska, A.J., Oria,  
889 R., Kechagia, J.Z., Rico-Lastres, P., Le Roux, A.-L., *et al.* (2017). Force Triggers YAP Nuclear  
890 Entry by Regulating Transport across Nuclear Pores. *Cell* *171*, 1397-1410.e1314.

891 Elosegui-Artola, A., Oria, R., Chen, Y., Kosmalska, A., Perez-Gonzalez, C., Castro, N., Zhu, C.,  
892 Trepap, X., and Roca-Cusachs, P. (2016). Mechanical regulation of a molecular clutch defines  
893 force transmission and transduction in response to matrix rigidity. *Nature cell biology* *18*, 540-  
894 548.

895 Engler, A.J., Sen, S., Sweeney, H.L., and Discher, D.E. (2006). Matrix Elasticity Directs Stem  
896 Cell Lineage Specification. *Cell* *126*, 677-689.

897 Eriksson, M., Brown, W.T., Gordon, L.B., Glynn, M.W., Singer, J., Scott, L., Erdos, M.R.,  
898 Robbins, C.M., Moses, T.Y., Berglund, P., *et al.* (2003). Recurrent de novo point mutations in  
899 lamin A cause Hutchinson-Gilford progeria syndrome. *Nature* *423*, 293-298.

900 Fatkin, D., MacRae, C., Sasaki, T., Wolff, M.R., Porcu, M., Frenneaux, M., Atherton, J.,  
901 Vidaillet, H.J., Jr., Spudich, S., De Girolami, U., *et al.* (1999). Missense mutations in the rod  
902 domain of the lamin A/C gene as causes of dilated cardiomyopathy and conduction-system  
903 disease. *The New England journal of medicine* *341*, 1715-1724.

904 Fischer, M., Rikeit, P., Knaus, P., and Coirault, C. (2016). YAP-Mediated Mechanotransduction  
905 in Skeletal Muscle. *Frontiers in physiology* *7*, 41.

906 Gesson, K., Rescheneder, P., Skoruppa, M.P., von Haeseler, A., Dechat, T., and Foisner, R.  
907 (2016). A-type lamins bind both hetero- and euchromatin, the latter being regulated by lamina-  
908 associated polypeptide 2 alpha. *Genome research* *26*, 462-473.

909 Gesson, K., Vidak, S., and Foisner, R. (2014). Lamina-associated polypeptide (LAP)2alpha and  
910 nucleoplasmic lamins in adult stem cell regulation and disease. *Seminars in cell &*  
911 *developmental biology* *29*, 116-124.

912 Ghibaudo, M., Saez, A., Trichet, L., Xayaphoummine, A., Browaeys, J., Silberzan, P., Buguin,  
913 A., and Ladoux, B. (2008). Traction forces and rigidity sensing regulate cell functions. *Soft*  
914 *Matter* *4*, 1836-1843.

915 Goldman, R.D., Gruenbaum, Y., Moir, R.D., Shumaker, D.K., and Spann, T.P. (2002). Nuclear  
916 lamins: building blocks of nuclear architecture. *Genes & development* *16*, 533-547.

917 Guilluy, C., and Burrridge, K. (2015). Nuclear mechanotransduction: forcing the nucleus to  
918 respond. *Nucleus* *6*, 19-22.

919 Guilluy, C., Osborne, L.D., Van Landeghem, L., Sharek, L., Superfine, R., Garcia-Mata, R., and  
920 Burrridge, K. (2014). Isolated nuclei adapt to force and reveal a mechanotransduction pathway in  
921 the nucleus. *Nature cell biology* *16*, 376-381.

922 Guo, M., Pegoraro, A.F., Mao, A., Zhou, E.H., Arany, P.R., Han, Y., Burnette, D.T., Jensen,  
923 M.H., Kasza, K.E., Moore, J.R., *et al.* (2017). Cell volume change through water efflux impacts  
924 cell stiffness and stem cell fate. *Proceedings of the National Academy of Sciences of the United*  
925 *States of America* *114*, E8618-e8627.

926 Guo, Y., and Zheng, Y. (2015). Lamins position the nuclear pores and centrosomes by  
927 modulating dynein. *Molecular biology of the cell* *26*, 3379-3389.

928 Hanson, L., Zhao, W., Lou, H.Y., Lin, Z.C., Lee, S.W., Chowdary, P., Cui, Y., and Cui, B.  
929 (2015). Vertical nanopillars for in situ probing of nuclear mechanics in adherent cells. *Nature*  
930 *nanotechnology* *10*, 554-562.

931 Harada, T., Swift, J., Irianto, J., Shin, J.W., Spinler, K.R., Athirasala, A., Diegmiller, R., Dingal,  
932 P.C., Ivanovska, I.L., and Discher, D.E. (2014). Nuclear lamin stiffness is a barrier to 3D  
933 migration, but softness can limit survival. *The Journal of cell biology* *204*, 669-682.

934 Huebsch, N., Arany, P.R., Mao, A.S., Shvartsman, D., Ali, O.A., Bencherif, S.A., Rivera-  
935 Feliciano, J., and Mooney, D.J. (2010). Harnessing traction-mediated manipulation of the  
936 cell/matrix interface to control stem-cell fate. *Nature materials* *9*, 518-526.

937 Humphrey, J.D., Dufresne, E.R., and Schwartz, M.A. (2014). Mechanotransduction and  
938 extracellular matrix homeostasis. *Nature reviews Molecular cell biology* *15*, 802-812.

939 Irianto, J., Pfeifer, C.R., Ivanovska, I.L., Swift, J., and Discher, D.E. (2016). Nuclear lamins in  
940 cancer. *Cell Mol Bioeng* *9*, 258-267.

941 Khavari, A., and Ehrlicher, A.J. (2019). Nuclei deformation reveals pressure distributions in 3D  
942 cell clusters. *PLoS One* *14*, e0221753-e0221753.

943 Kirby, T.J., and Lammerding, J. (2018). Emerging views of the nucleus as a cellular  
944 mechanosensor. *Nature cell biology* *20*, 373-381.

945 Kofler, M., Speight, P., Little, D., Di Ciano-Oliveira, C., Szászi, K., and Kapus, A. (2018).  
946 Mediated nuclear import and export of TAZ and the underlying molecular requirements. *Nature*  
947 *communications* *9*, 4966.

948 Kohn, J.C., Zhou, D.W., Bordeleau, F., Zhou, A.L., Mason, B.N., Mitchell, M.J., King, M.R.,  
949 and Reinhart-King, C.A. (2015). Cooperative effects of matrix stiffness and fluid shear stress on  
950 endothelial cell behavior. *Biophysical journal* *108*, 471-478.

951 Lammerding, J. (2011). Mechanics of the nucleus. *Comprehensive Physiology* *1*, 783-807.

952 Lammerding, J., Fong, L.G., Ji, J.Y., Reue, K., Stewart, C.L., Young, S.G., and Lee, R.T. (2006).  
953 Lamins A and C but not lamin B1 regulate nuclear mechanics. *The Journal of biological*  
954 *chemistry* *281*, 25768-25780.

955 Lammerding, J., Schulze, P.C., Takahashi, T., Kozlov, S., Sullivan, T., Kamm, R.D., Stewart,  
956 C.L., and Lee, R.T. (2004). Lamin A/C deficiency causes defective nuclear mechanics and  
957 mechanotransduction. *J Clin Invest* *113*, 370-378.

958 Lee, J.Y., Chang, J.K., Dominguez, A.A., Lee, H.-p., Nam, S., Chang, J., Varma, S., Qi, L.S.,  
959 West, R.B., and Chaudhuri, O. (2019). YAP-independent mechanotransduction drives breast  
960 cancer progression. *Nature communications* *10*, 1848.

961 Lombardi, M.L., Jaalouk, D.E., Shanahan, C.M., Burke, B., Roux, K.J., and Lammerding, J.  
962 (2011). The interaction between nesprins and sun proteins at the nuclear envelope is critical for  
963 force transmission between the nucleus and cytoskeleton. *The Journal of biological chemistry*  
964 *286*, 26743-26753.

965 Maeshima, K., Yahata, K., Sasaki, Y., Nakatomi, R., Tachibana, T., Hashikawa, T., Imamoto, F.,  
966 and Imamoto, N. (2006). Cell-cycle-dependent dynamics of nuclear pores: pore-free islands and  
967 lamins. *Journal of cell science* *119*, 4442.

968 Martino, F., Perestrelo, A.R., Vinarský, V., Pagliari, S., and Forte, G. (2018). Cellular  
969 Mechanotransduction: From Tension to Function. *9*.

970 Matsushita, N., Matsushita, S., Hirakawa, S., and Higashiyama, S. (2013). Doxycycline-  
971 dependent inducible and reversible RNA interference mediated by a single lentivirus vector.  
972 *Bioscience, biotechnology, and biochemistry* *77*, 776-781.

- 973 Mehta, D., and Gunst, S.J. (1999). Actin polymerization stimulated by contractile activation  
974 regulates force development in canine tracheal smooth muscle. *J Physiol* 519 Pt 3, 829-840.
- 975 Miroshnikova, Y.A., Nava, M.M., and Wickstrom, S.A. (2017). Emerging roles of mechanical  
976 forces in chromatin regulation. *Journal of cell science* 130, 2243-2250.
- 977 Moir, R.D., Spann, T.P., Lopez-Soler, R.I., Yoon, M., Goldman, A.E., Khuon, S., and Goldman,  
978 R.D. (2000). Review: the dynamics of the nuclear lamins during the cell cycle-- relationship  
979 between structure and function. *Journal of structural biology* 129, 324-334.
- 980 Naetar, N., Ferraioli, S., and Foisner, R. (2017). Lamins in the nuclear interior – life outside the  
981 lamina. *Journal of cell science* 130, 2087.
- 982 Nardone, G., Oliver-De La Cruz, J., Vrbsky, J., Martini, C., Pribyl, J., Skládal, P., Pešl, M.,  
983 Caluori, G., Pagliari, S., Martino, F., *et al.* (2017). YAP regulates cell mechanics by controlling  
984 focal adhesion assembly. *Nature communications* 8, 15321.
- 985 Nukuda, A., Sasaki, C., Ishihara, S., Mizutani, T., Nakamura, K., Ayabe, T., Kawabata, K., and  
986 Haga, H. (2015). Stiff substrates increase YAP-signaling-mediated matrix metalloproteinase-7  
987 expression. *Oncogenesis* 4, e165-e165.
- 988 Olins, A.L., Zwerger, M., Herrmann, H., Zentgraf, H., Simon, A.J., Monestier, M., and Olins,  
989 D.E. (2008). The human granulocyte nucleus: Unusual nuclear envelope and heterochromatin  
990 composition. *European journal of cell biology* 87, 279-290.
- 991 Oliver-De La Cruz, J., Nardone, G., Vrbsky, J., Pompeiano, A., Perestrelo, A.R., Capradossi, F.,  
992 Melajová, K., Filipensky, P., and Forte, G. (2019). Substrate mechanics controls adipogenesis  
993 through YAP phosphorylation by dictating cell spreading. *Biomaterials* 205, 64-80.
- 994 Pajerowski, J.D., Dahl, K.N., Zhong, F.L., Sammak, P.J., and Discher, D.E. (2007). Physical  
995 plasticity of the nucleus in stem cell differentiation. *Proceedings of the National Academy of*  
996 *Sciences of the United States of America* 104, 15619-15624.
- 997 Pan, J.-X., Xiong, L., Zhao, K., Zeng, P., Wang, B., Tang, F.-L., Sun, D., Guo, H.-h., Yang, X.,  
998 Cui, S., *et al.* (2018). YAP promotes osteogenesis and suppresses adipogenic differentiation by  
999 regulating  $\beta$ -catenin signaling. *Bone Research* 6, 18.
- 1000 Pavel, M., Renna, M., Park, S.J., Menzies, F.M., Ricketts, T., Füllgrabe, J., Ashkenazi, A., Frake,  
1001 R.A., Lombarte, A.C., Bento, C.F., *et al.* (2018). Contact inhibition controls cell survival and  
1002 proliferation via YAP/TAZ-autophagy axis. *Nature communications* 9, 2961.
- 1003 Piccolo, S., Dupont, S., and Cordenonsi, M. (2014). The biology of YAP/TAZ: hippo signaling  
1004 and beyond. *Physiological reviews* 94, 1287-1312.
- 1005 Rammensee, S., Kang, M.S., Georgiou, K., Kumar, S., and Schaffer, D.V. (2017). Dynamics of  
1006 Mechanosensitive Neural Stem Cell Differentiation. *Stem Cells* 35, 497-506.
- 1007 Schirmer, E.C., and Gerace, L. (2004). The stability of the nuclear lamina polymer changes with  
1008 the composition of lamin subtypes according to their individual binding strengths. *The Journal of*  
1009 *biological chemistry* 279, 42811-42817.
- 1010 Shiu, J.-Y., Aires, L., Lin, Z., and Vogel, V. (2018). Nanopillar force measurements reveal actin-  
1011 cap-mediated YAP mechanotransduction. *Nature cell biology* 20, 262-271.
- 1012 Srivastava, L.K., Ju, Z., Ghagre, A., and Ehrlicher, A.J. (2019). Spatial distribution of lamin A  
1013 determines nuclear stiffness and stress-mediated deformation. *bioRxiv*, 765263.
- 1014 Swift, J., and Discher, D.E. (2014). The nuclear lamina is mechano-responsive to ECM elasticity  
1015 in mature tissue. *Journal of cell science* 127, 3005-3015.
- 1016 Swift, J., Ivanovska, I.L., Buxboim, A., Harada, T., Dingal, P.C., Pinter, J., Pajerowski, J.D.,  
1017 Spinler, K.R., Shin, J.W., Tewari, M., *et al.* (2013). Nuclear lamin-A scales with tissue stiffness  
1018 and enhances matrix-directed differentiation. *Science (New York, NY)* 341, 1240104.

1019 Trappmann, B., Gautrot, J.E., Connelly, J.T., Strange, D.G., Li, Y., Oyen, M.L., Cohen Stuart,  
1020 M.A., Boehm, H., Li, B., Vogel, V., *et al.* (2012). Extracellular-matrix tethering regulates stem-  
1021 cell fate. *Nature materials* *11*, 642-649.

1022 Turgay, Y., Eibauer, M., Goldman, A.E., Shimi, T., Khayat, M., Ben-Harush, K., Dubrovsky-  
1023 Gaupp, A., Sapra, K.T., Goldman, R.D., and Medalia, O. (2017). The molecular architecture of  
1024 lamins in somatic cells. *Nature* *543*, 261-264.

1025 Varelas, X. (2014). The Hippo pathway effectors TAZ and YAP in development, homeostasis  
1026 and disease. *Development (Cambridge, England)* *141*, 1614-1626.

1027 Verstraeten, V., Ji, J., Cummings, K., Lee, R., and Lammerding, J. (2008). Increased  
1028 mechanosensitivity and nuclear stiffness in Hutchinson-Gilford progeria cells: Effects of  
1029 farnesyltransferase inhibitors. *Aging cell* *7*, 383-393.

1030 Wang, K.-C., Yeh, Y.-T., Nguyen, P., Limqueco, E., Lopez, J., Thorossian, S., Guan, K.-L., Li,  
1031 Y.-S.J., and Chien, S. (2016). Flow-dependent YAP/TAZ activities regulate endothelial  
1032 phenotypes and atherosclerosis. *Proceedings of the National Academy of Sciences* *113*, 11525.

1033 Warren, J.S.A., Xiao, Y., and Lamar, J.M. (2018). YAP/TAZ Activation as a Target for Treating  
1034 Metastatic Cancer. *Cancers* *10*.

1035 Yeung, T., Georges, P.C., Flanagan, L.A., Marg, B., Ortiz, M., Funaki, M., Zahir, N., Ming, W.,  
1036 Weaver, V., and Janmey, P.A. (2005). Effects of substrate stiffness on cell morphology,  
1037 cytoskeletal structure, and adhesion. *Cell motility and the cytoskeleton* *60*, 24-34.

1038 Yoshie, H., Koushki, N., Kaviani, R., Tabatabaei, M., Rajendran, K., Dang, Q., Husain, A., Yao,  
1039 S., Li, C., Sullivan, J.K., *et al.* (2018). Traction Force Screening Enabled by Compliant PDMS  
1040 Elastomers. *Biophysical journal* *114*, 2194-2199.

1041 Zanconato, F., Battilana, G., Cordenonsi, M., and Piccolo, S. (2016a). YAP/TAZ as therapeutic  
1042 targets in cancer. *Current opinion in pharmacology* *29*, 26-33.

1043 Zanconato, F., Cordenonsi, M., and Piccolo, S. (2016b). YAP/TAZ at the Roots of Cancer.  
1044 *Cancer cell* *29*, 783-803.

1045 Zhao, B., Li, L., Lei, Q., and Guan, K.L. (2010). The Hippo-YAP pathway in organ size control  
1046 and tumorigenesis: an updated version. *Genes & development* *24*, 862-874.

1047 Zhao, B., Wei, X., Li, W., Udan, R.S., Yang, Q., Kim, J., Xie, J., Ikenoue, T., Yu, J., Li, L., *et al.*  
1048 (2007). Inactivation of YAP oncoprotein by the Hippo pathway is involved in cell contact  
1049 inhibition and tissue growth control. *Genes & development* *21*, 2747-2761.

1050 Zolghadr, K., Gregor, J., Leonhardt, H., and Rothbauer, U. (2012). Case study on live cell  
1051 apoptosis-assay using lamin-chromobody cell-lines for high-content analysis. *Methods in*  
1052 *molecular biology (Clifton, NJ)* *911*, 569-575.

1053
